# Supplementary material for: KCNK1 promotes proliferation and metastasis of breast cancer cells by activating lactate dehydrogenase A (LDHA) and up-regulating H3K18 lactylation
Source: PubMed Central journal article supplement (PMC11192366; doi:10.1371/journal.pbio.3002666), 2024-06-21

Figure 2b repeat 1

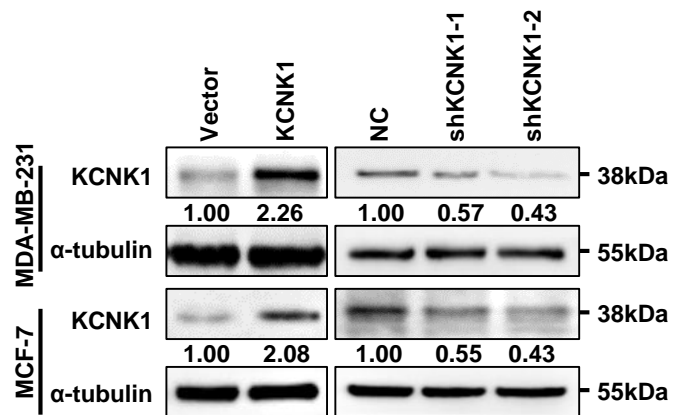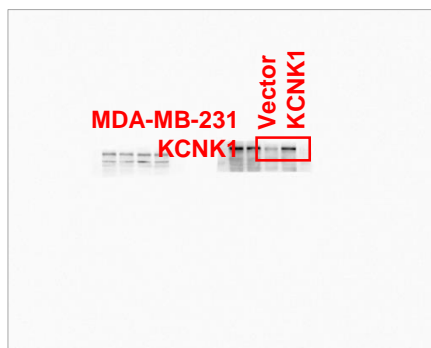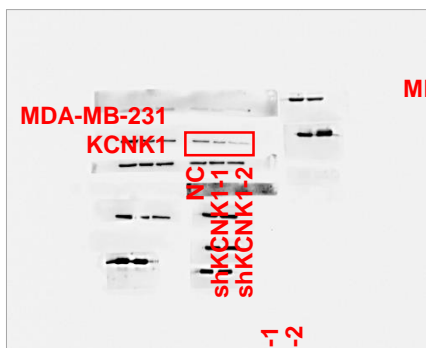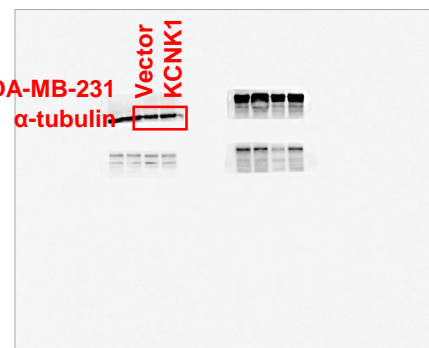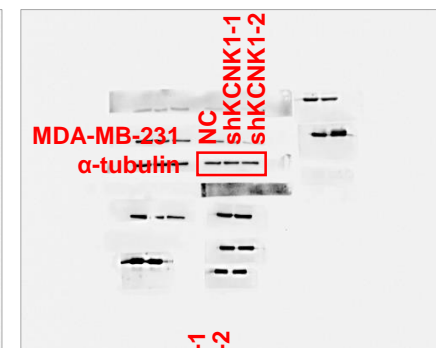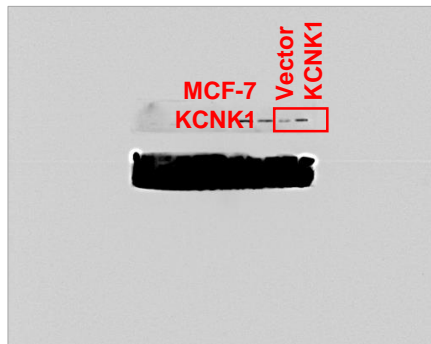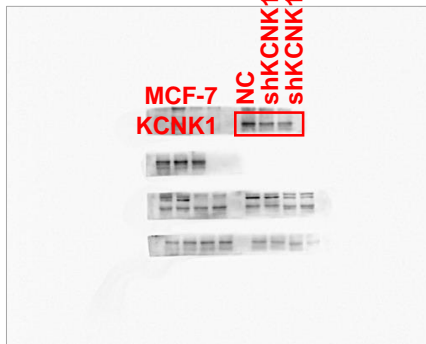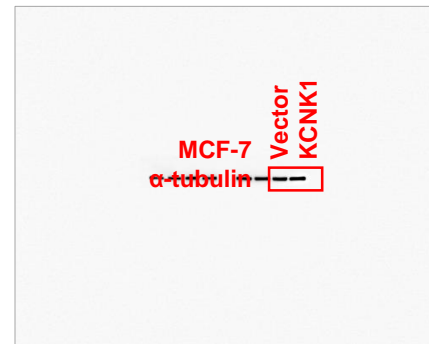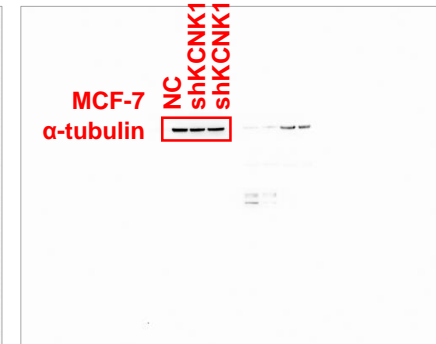

Figure 2b repeat 2

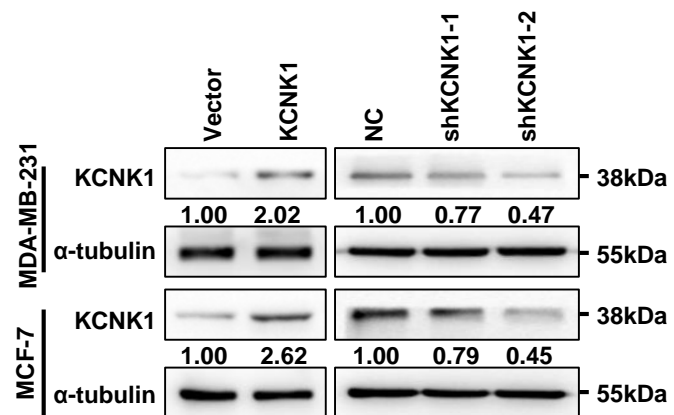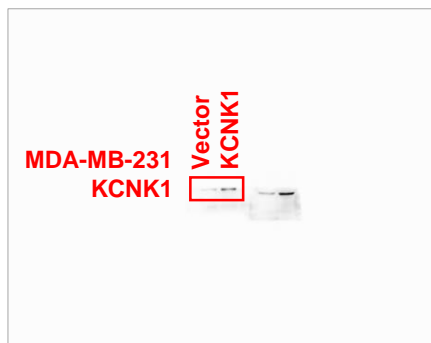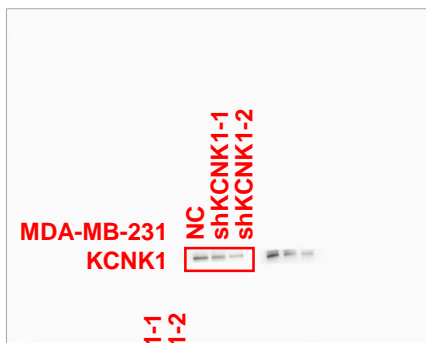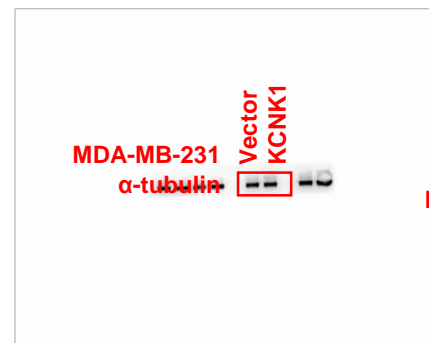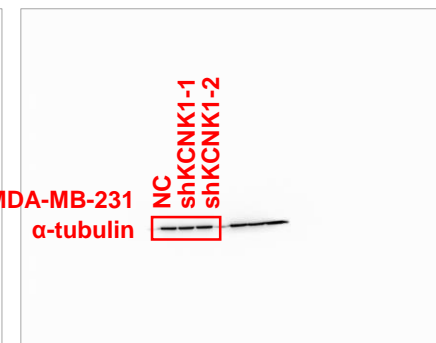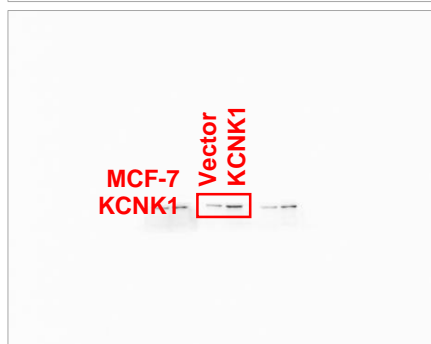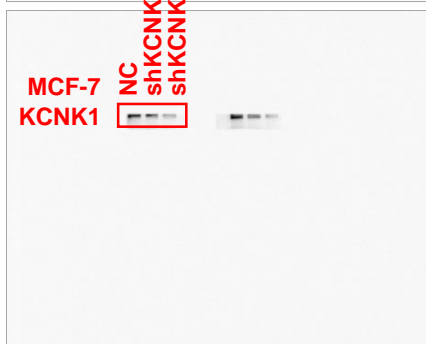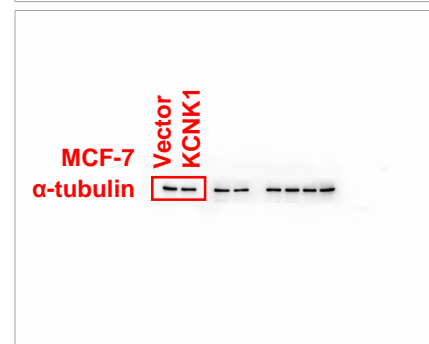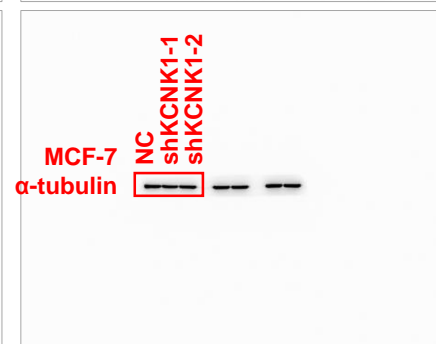

Figure 2b repeat 3

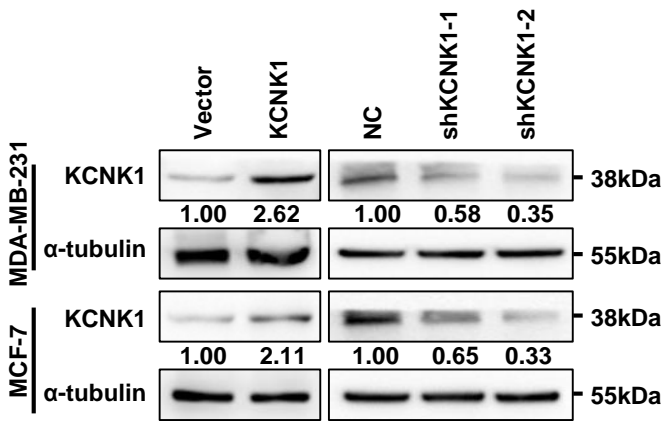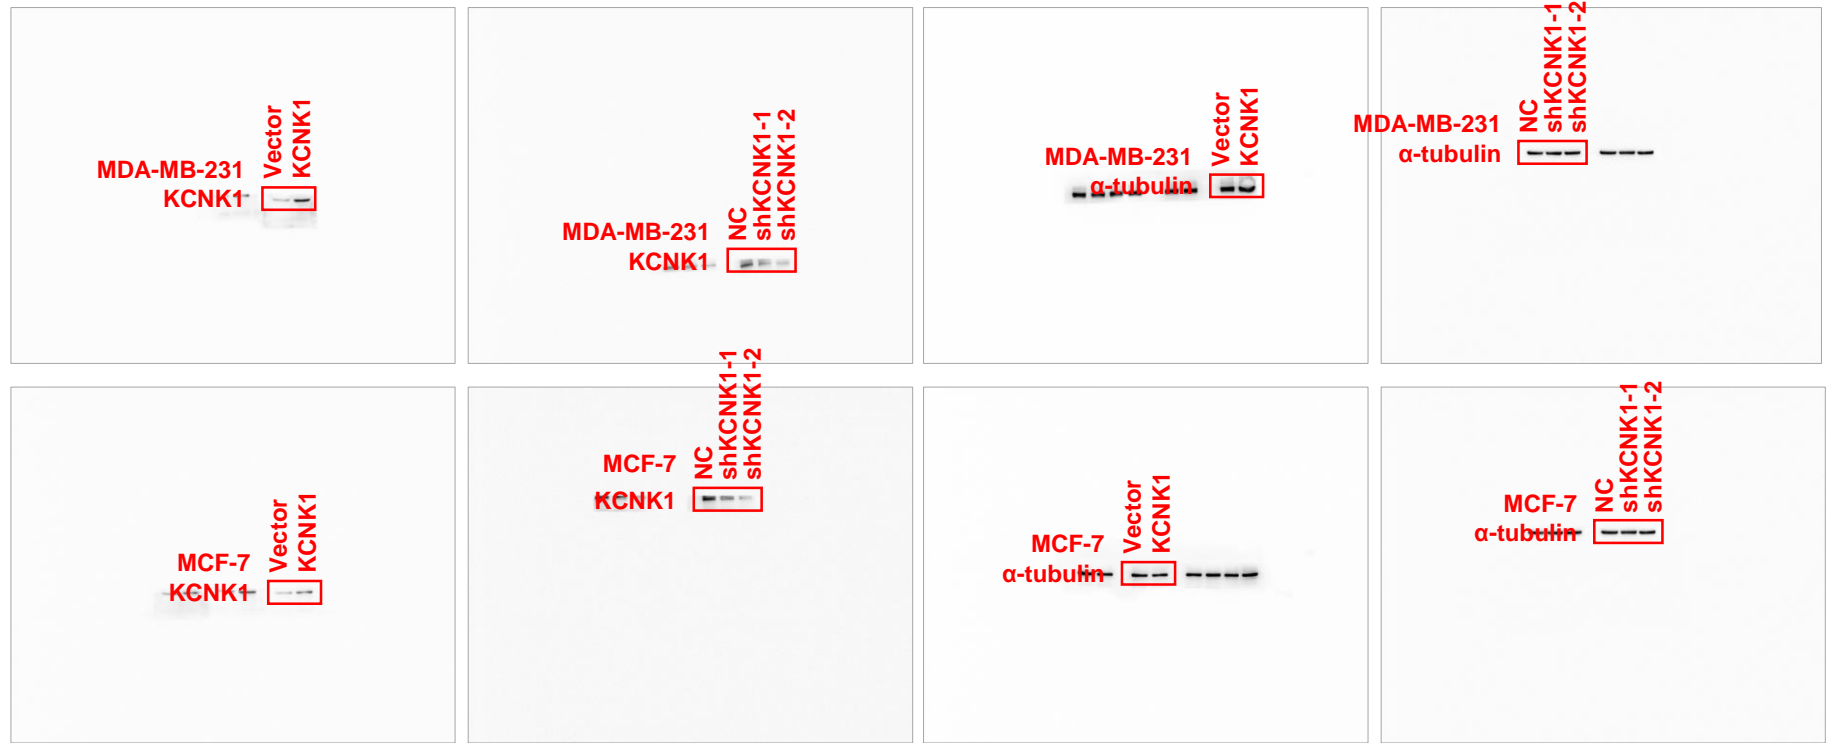

# Figure 3c

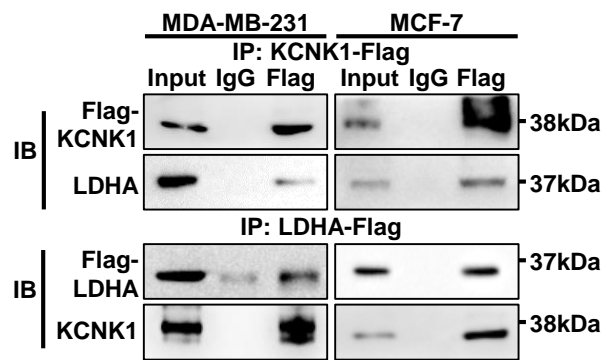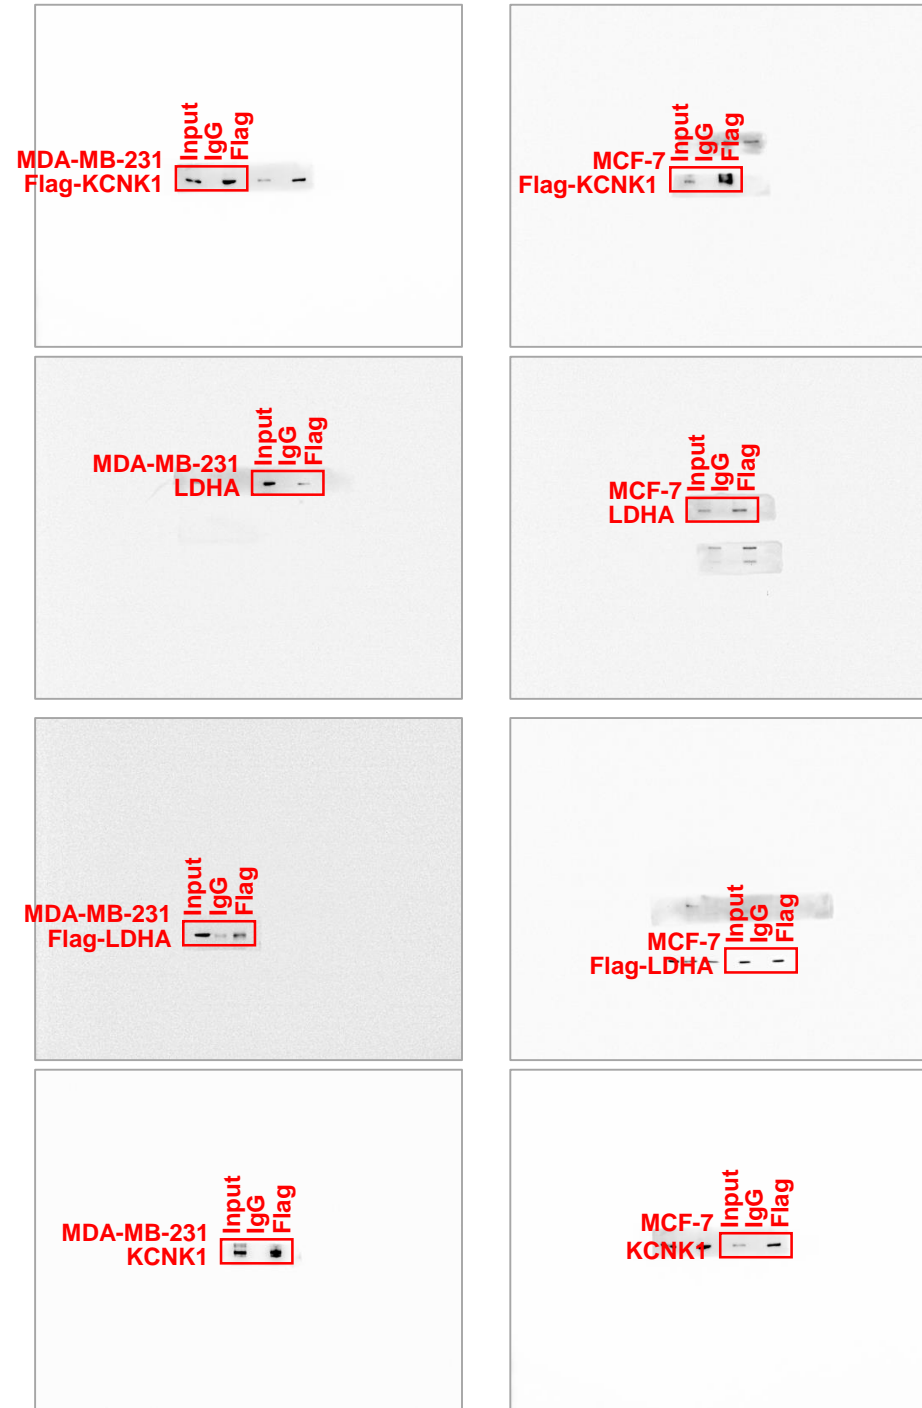

**Figure 3e repeat 1**

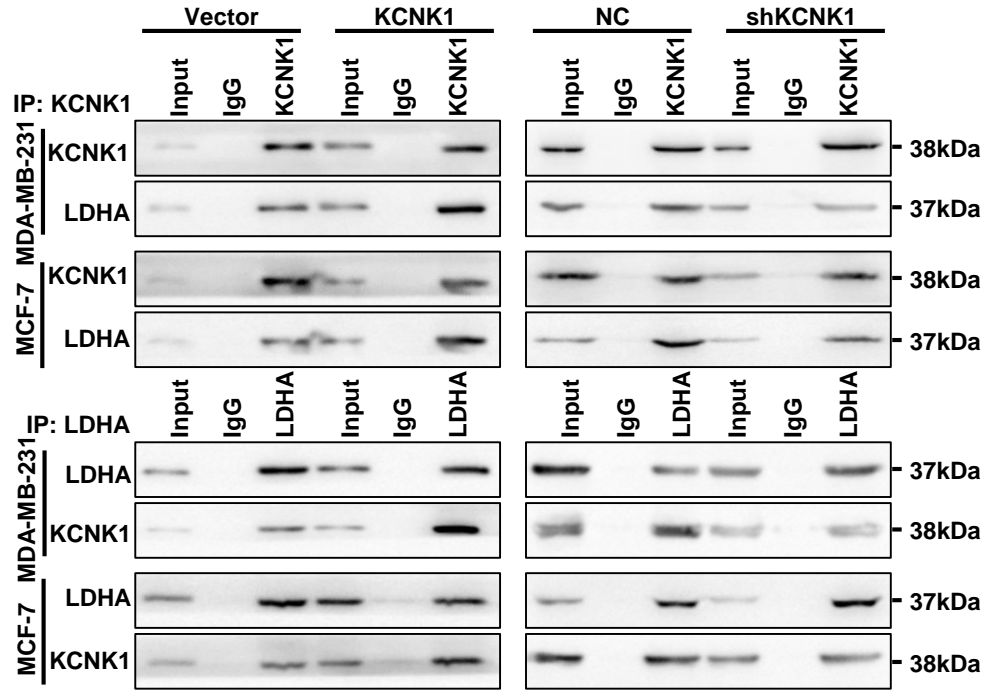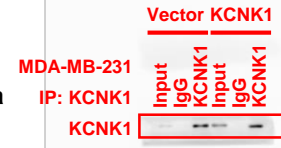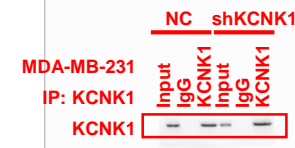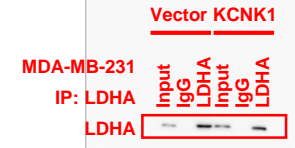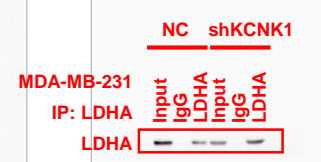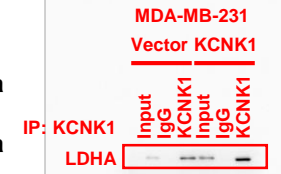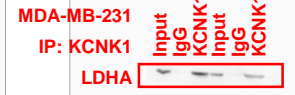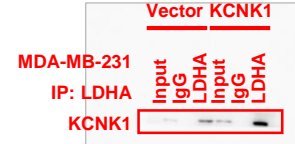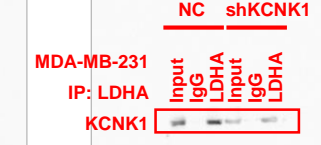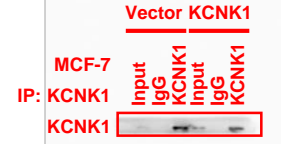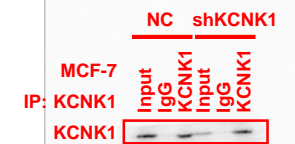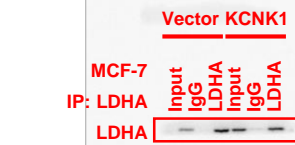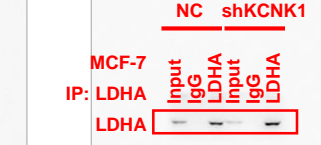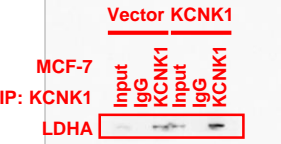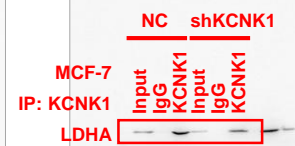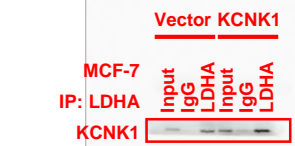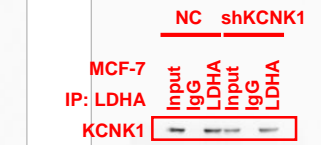

**Figure 3e repeat 2**

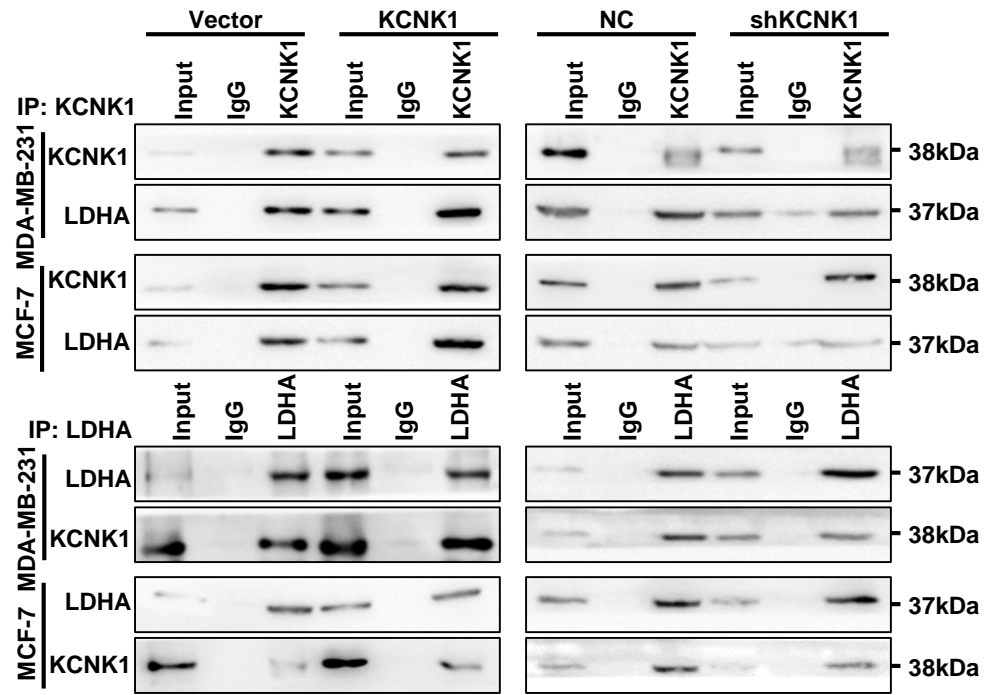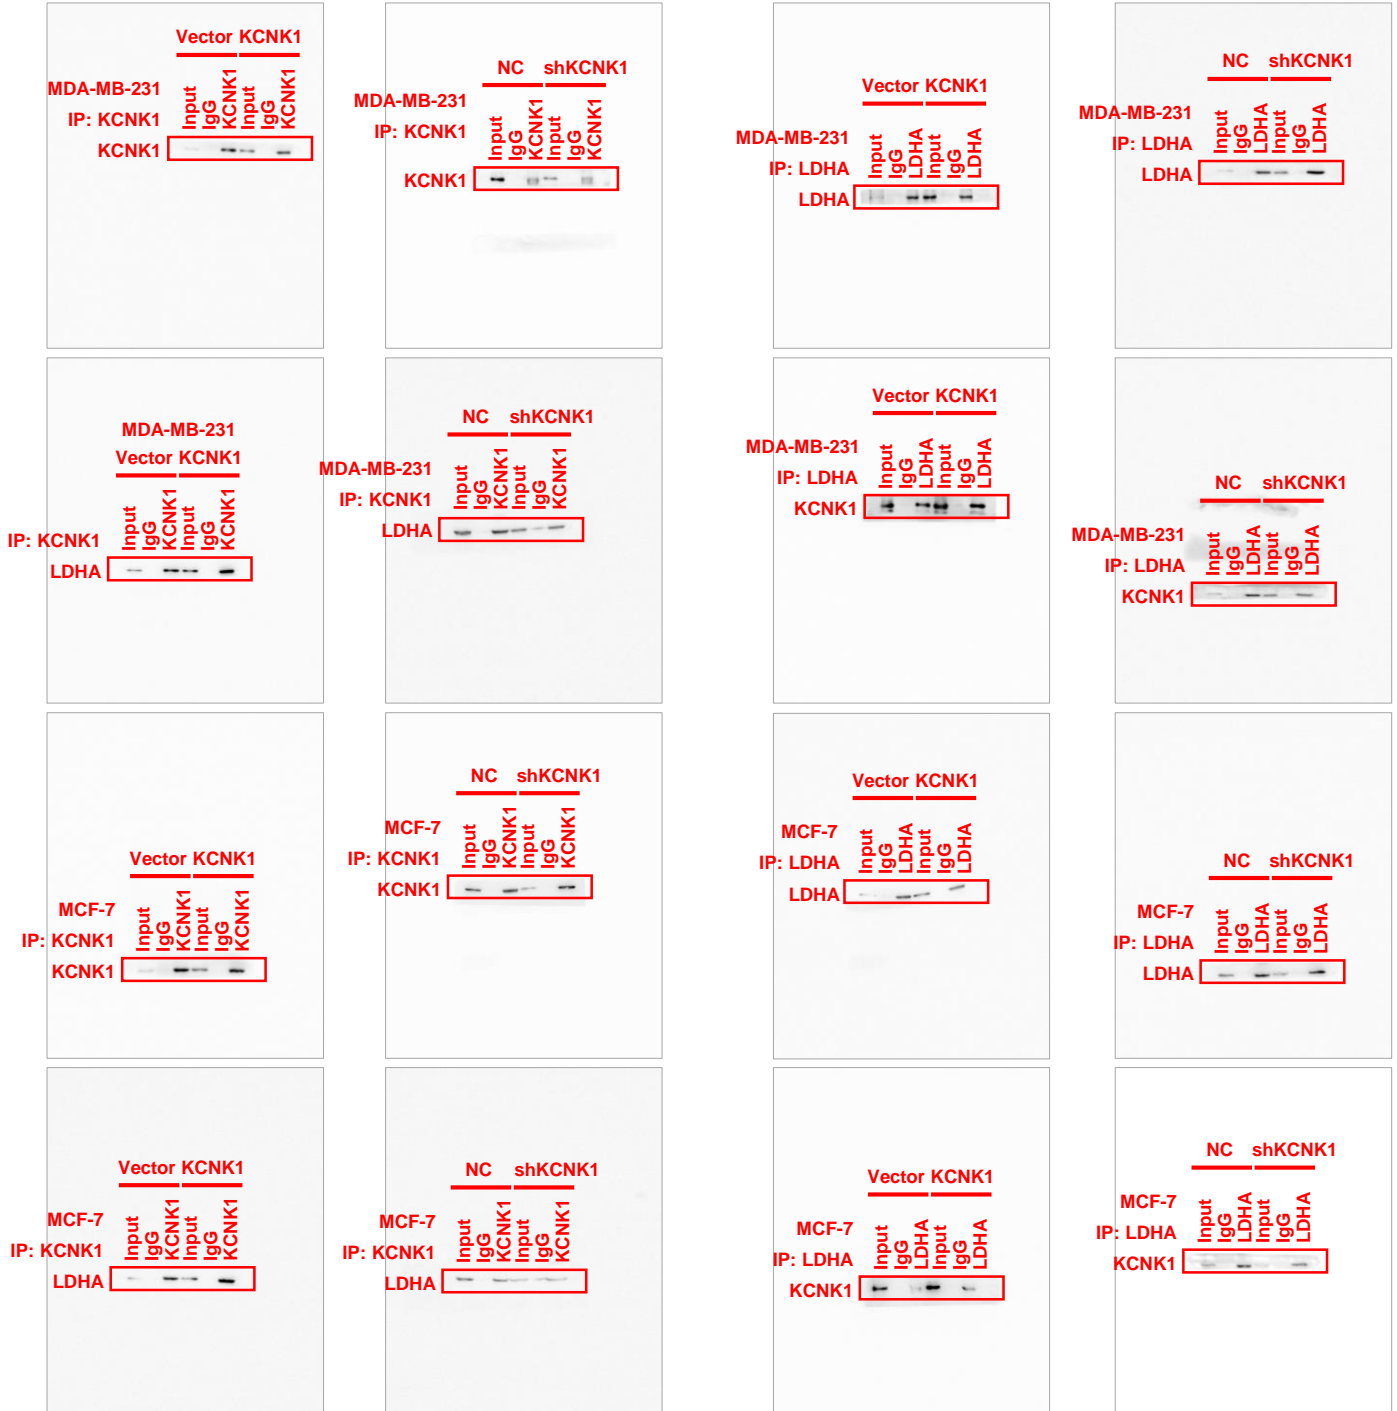

**Figure 3e repeat 3**

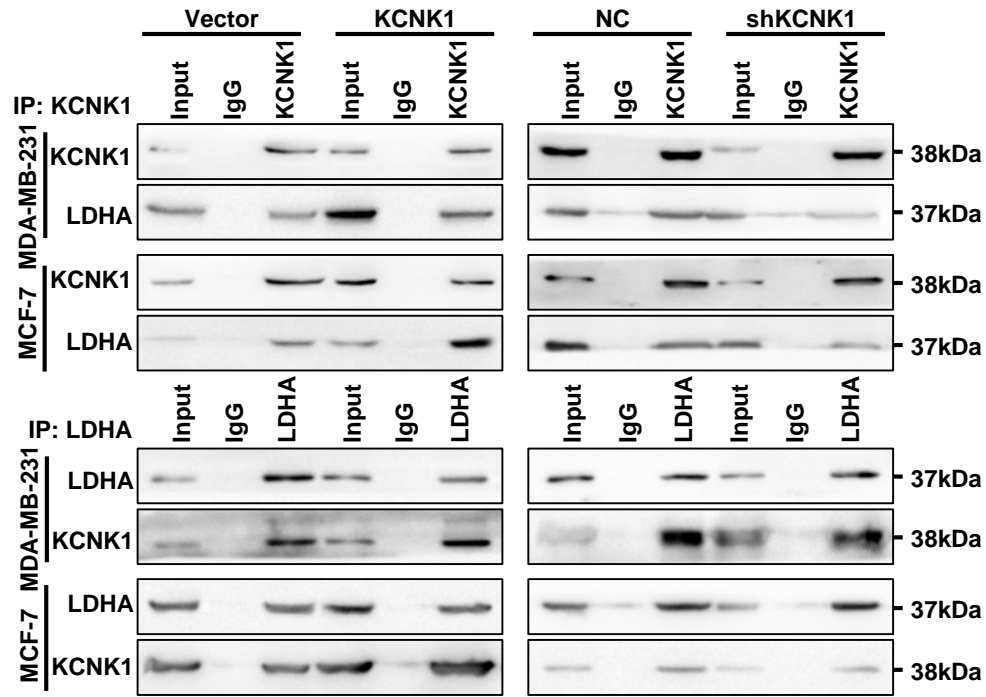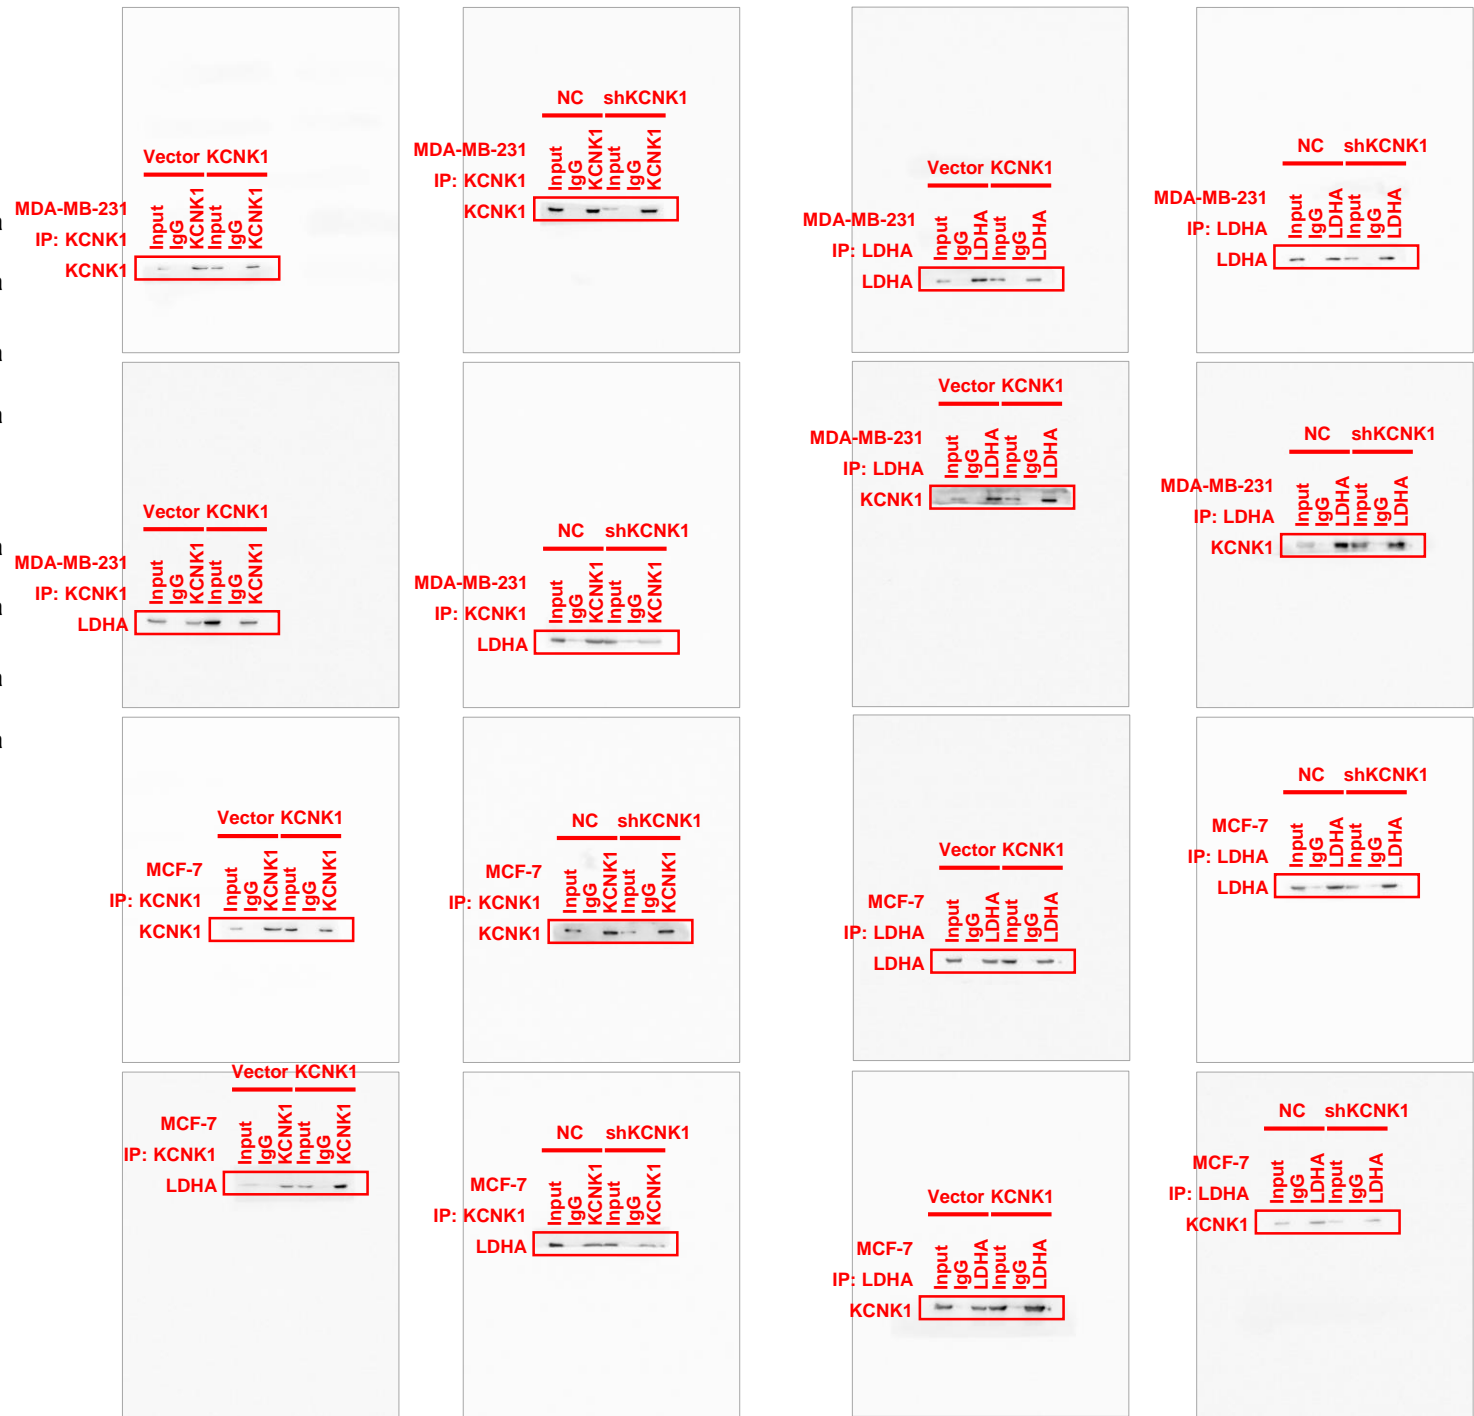

**Figure 5b repeat 1**

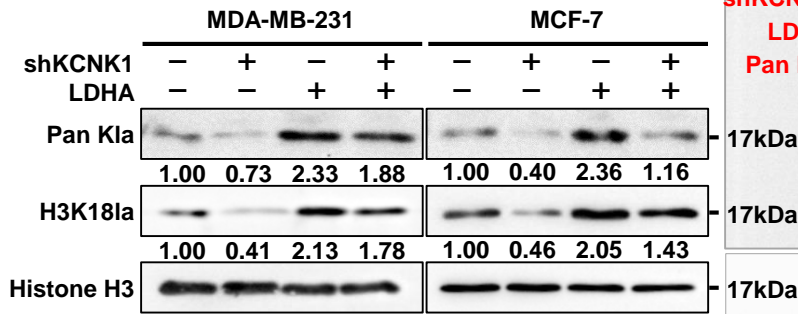

**Figure 5b repeat 2**

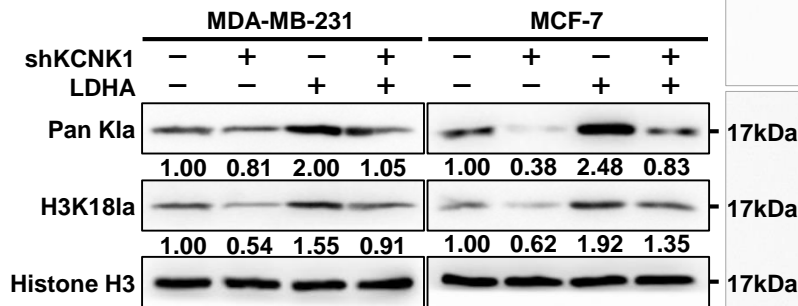

**Figure 5b repeat 1**

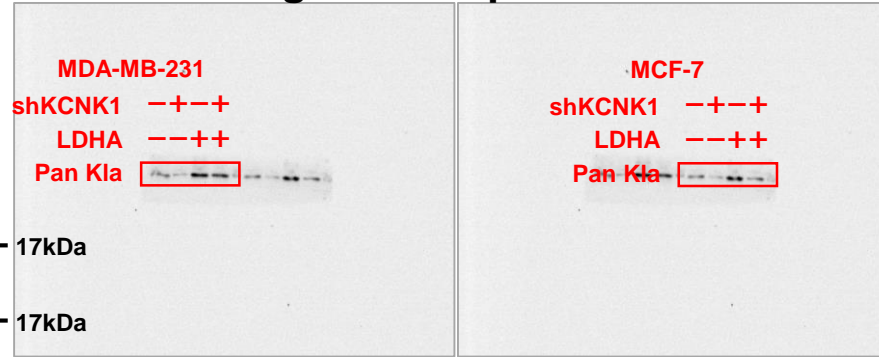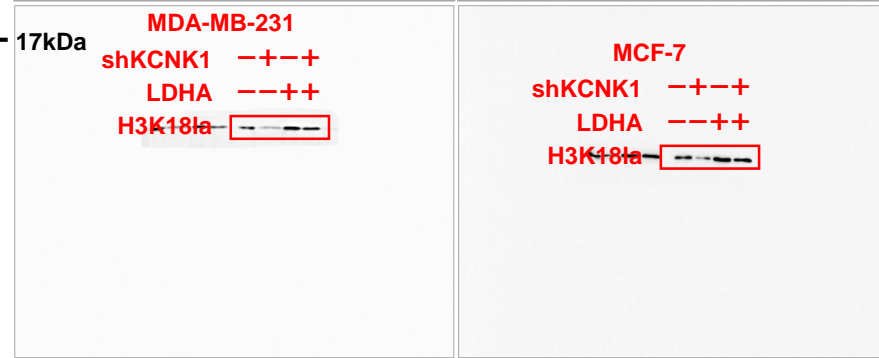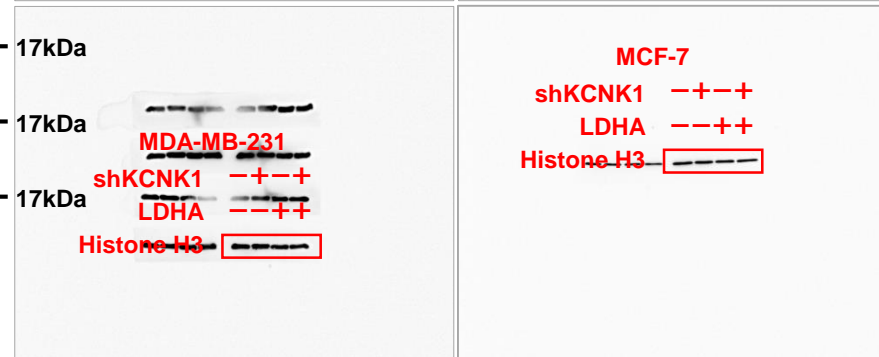

**Figure 5b repeat 2**

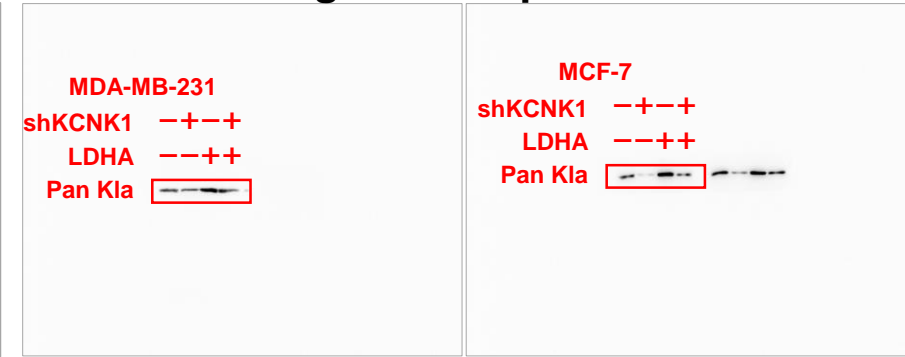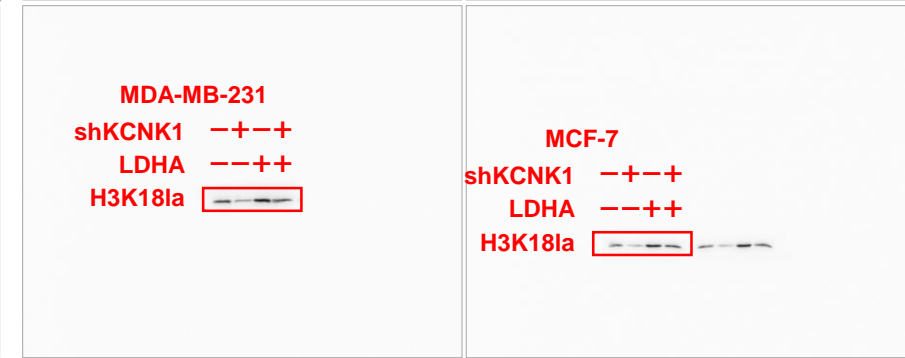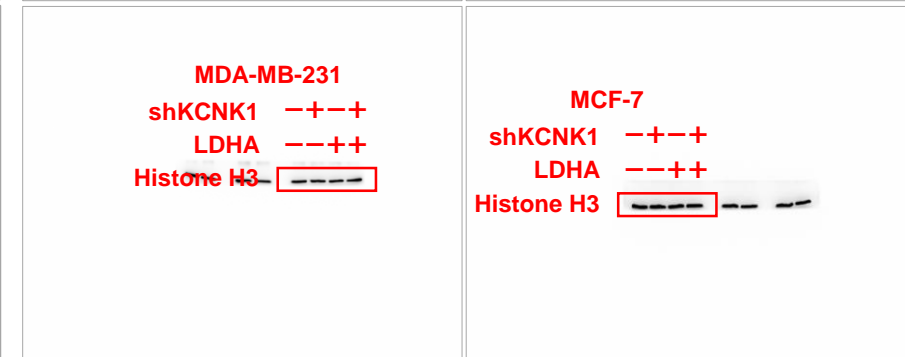

**Figure 5b repeat 3**

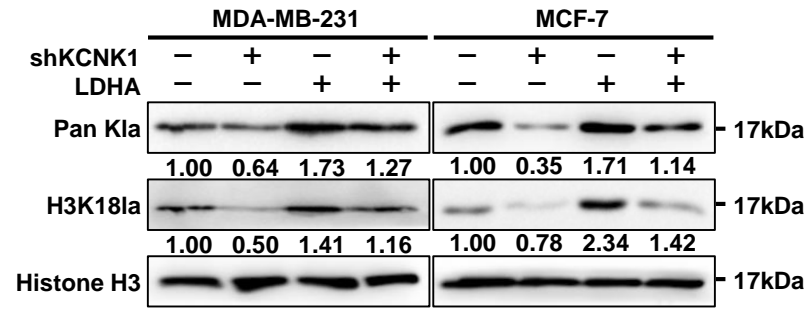

**Figure 5b repeat 3**

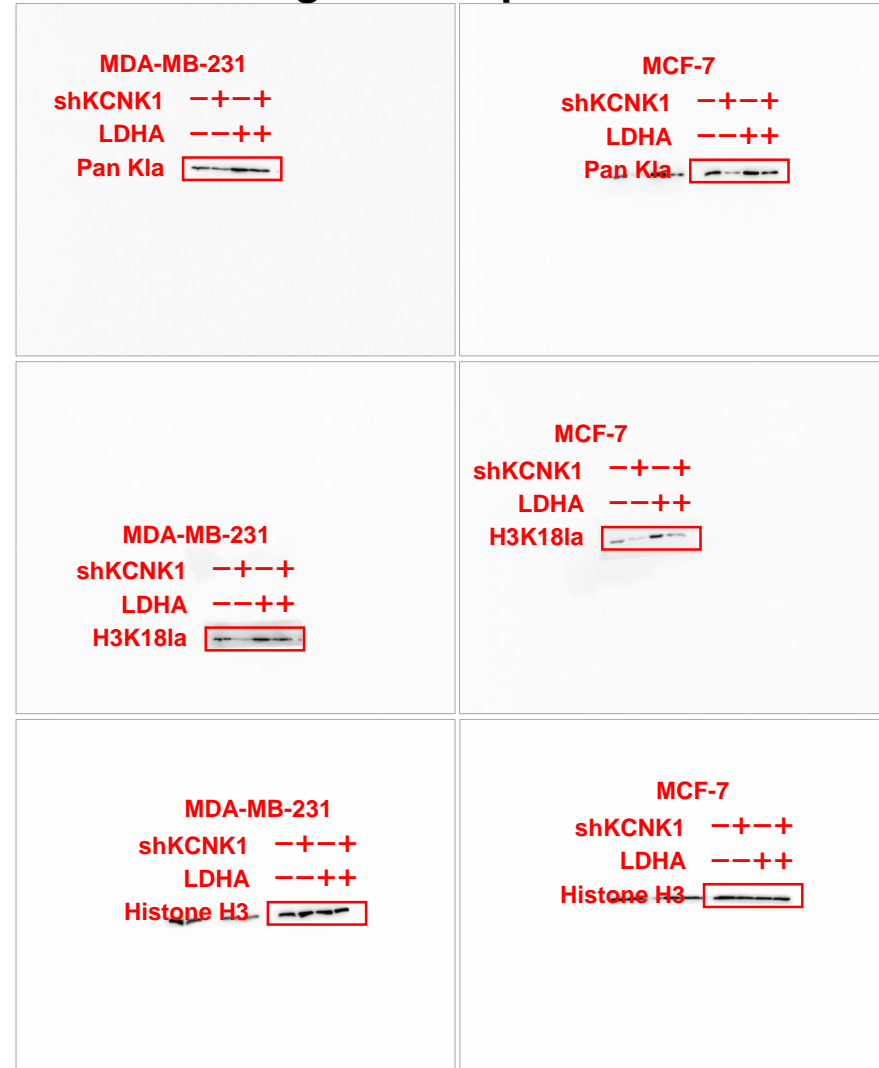





Figure 5f repeat 2

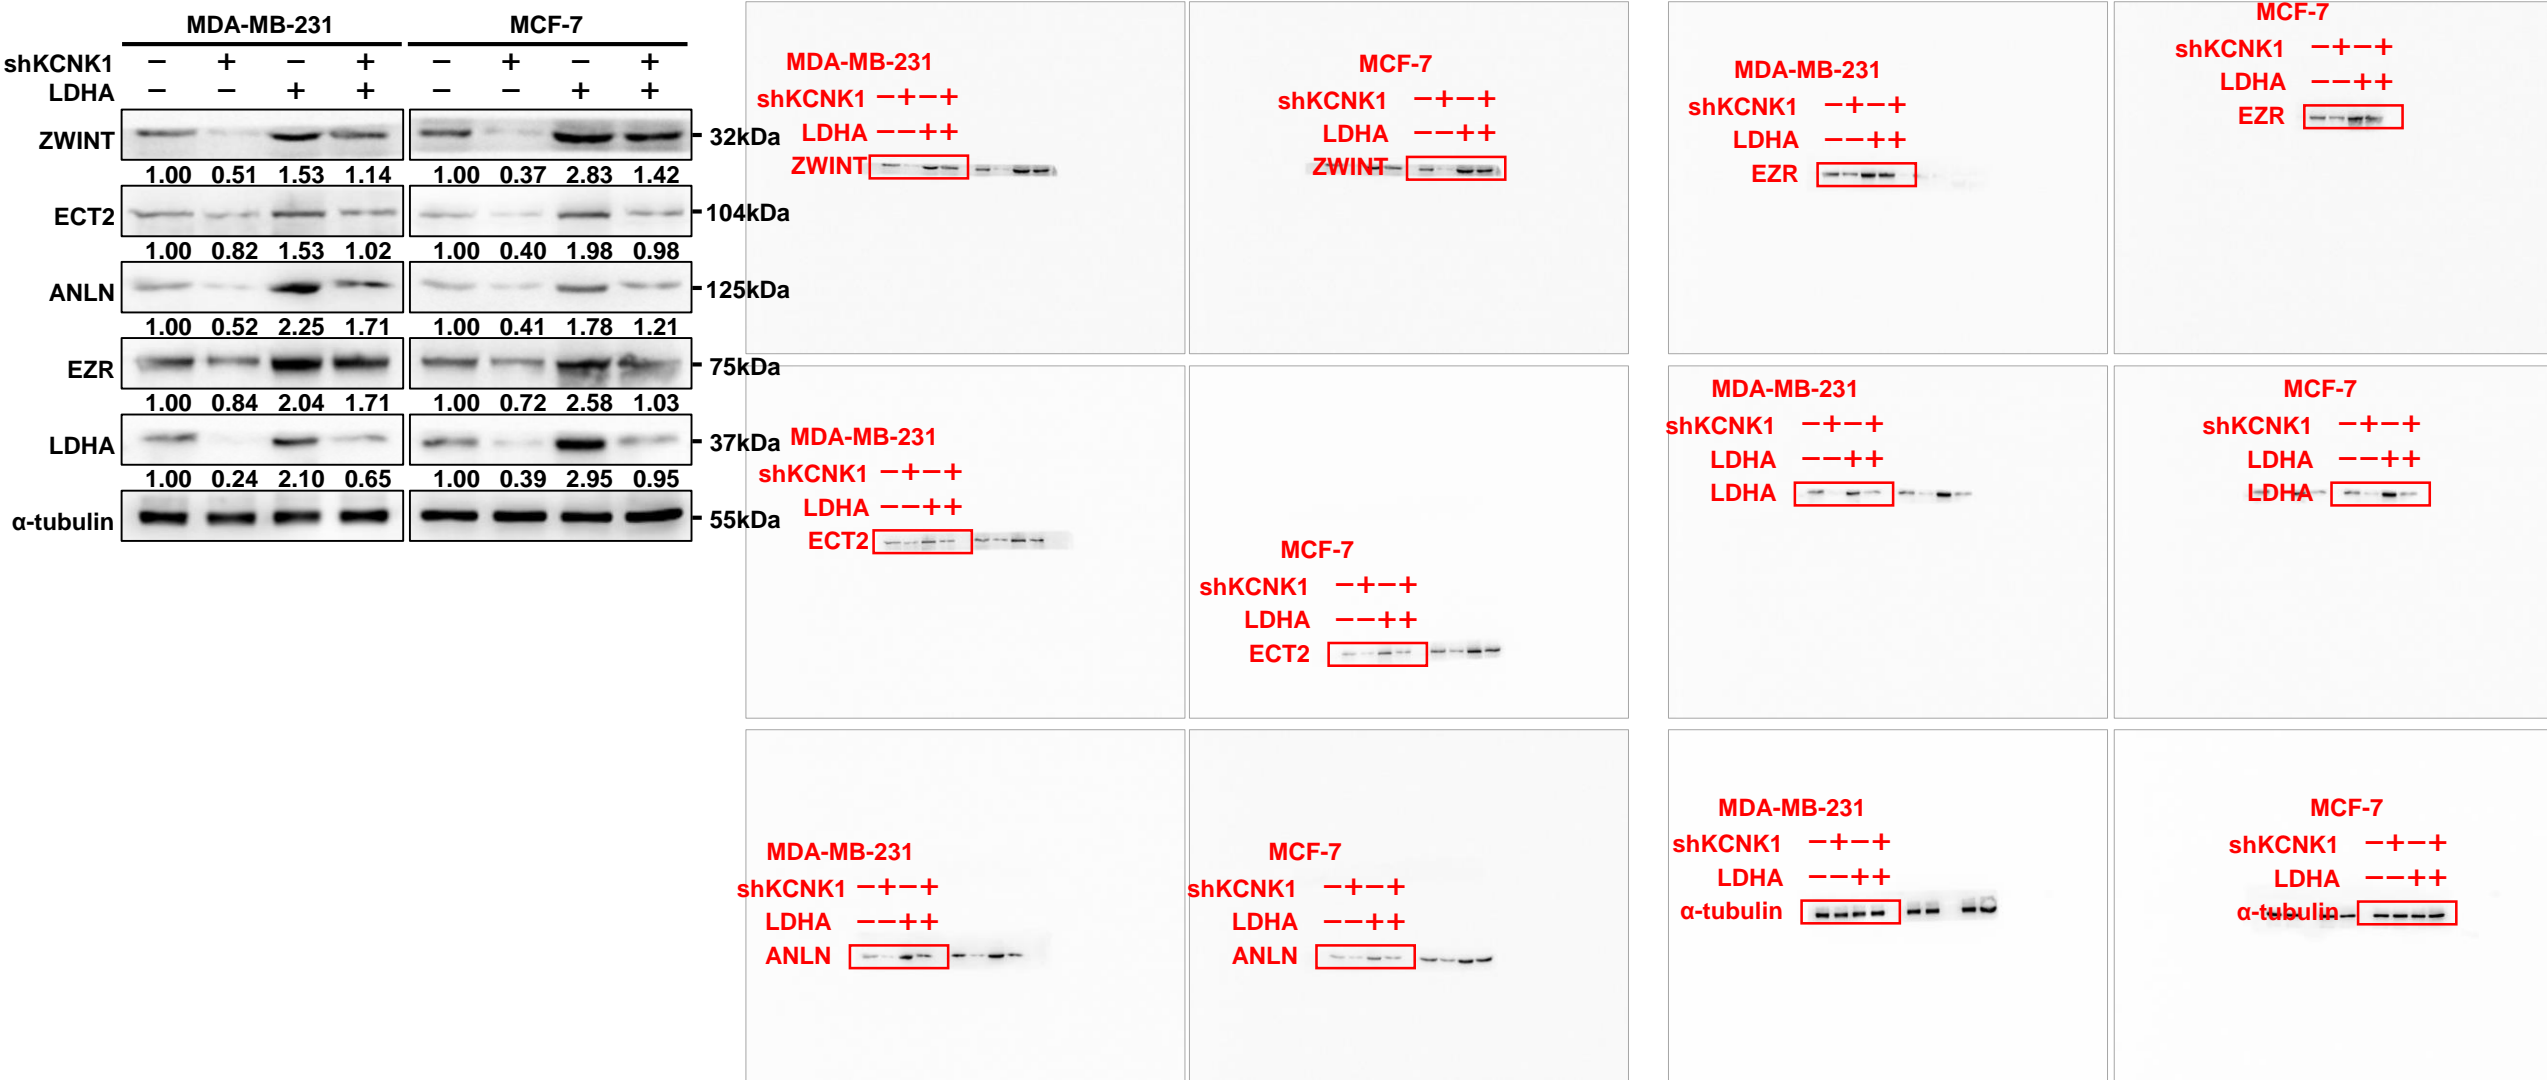

**Figure 5f repeat 3**

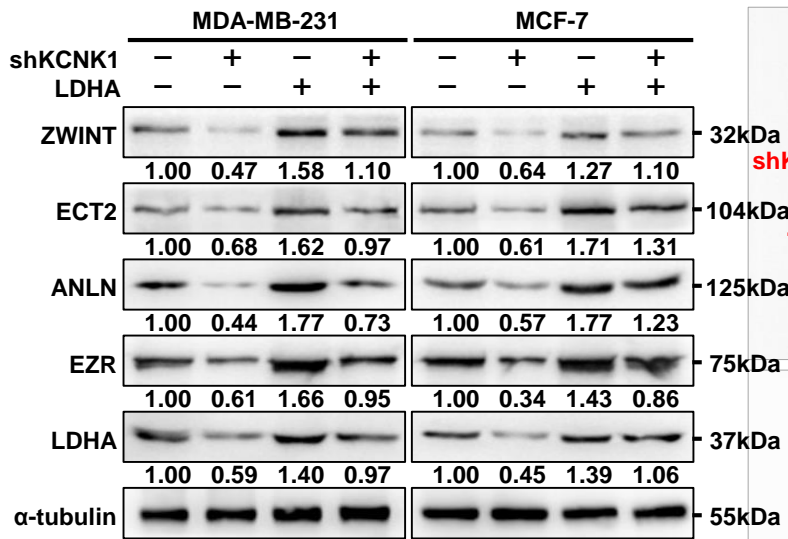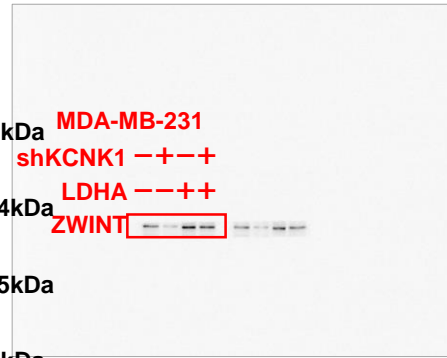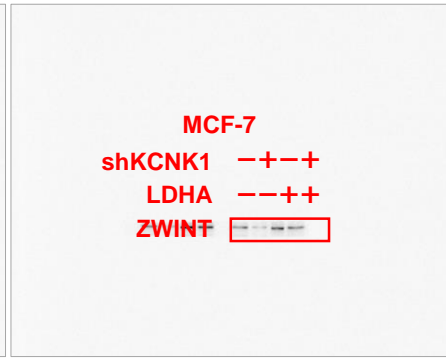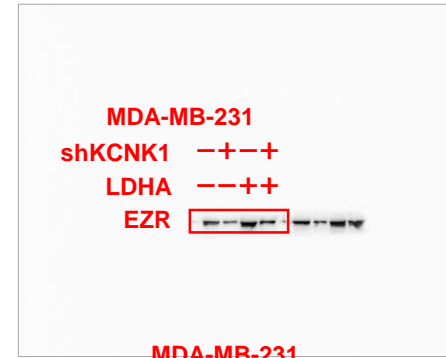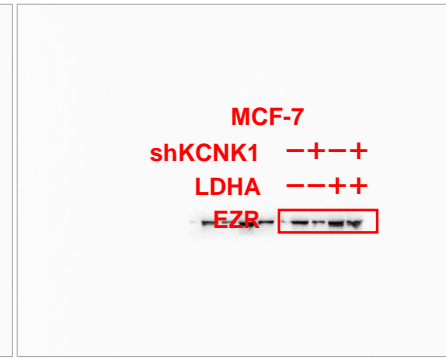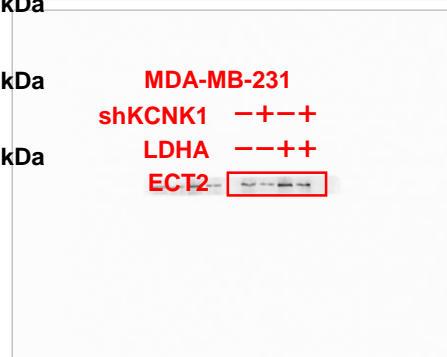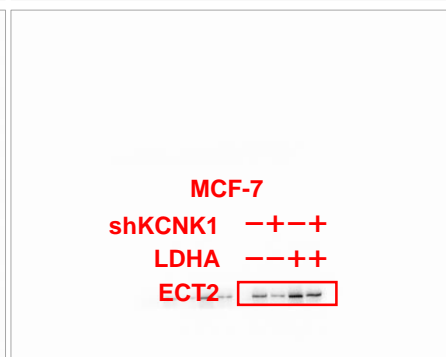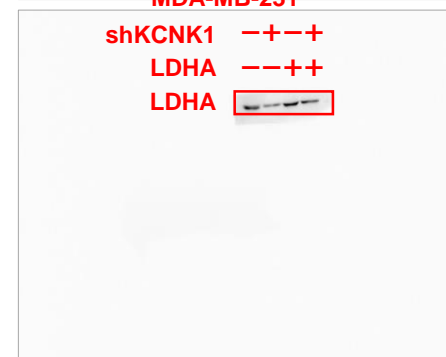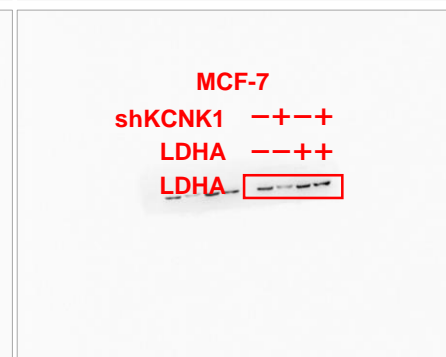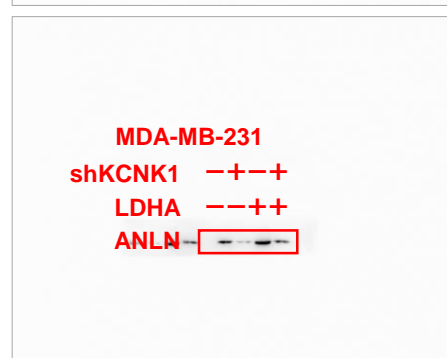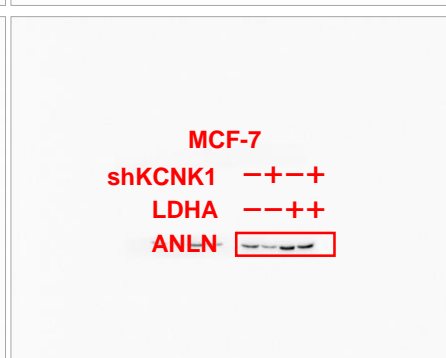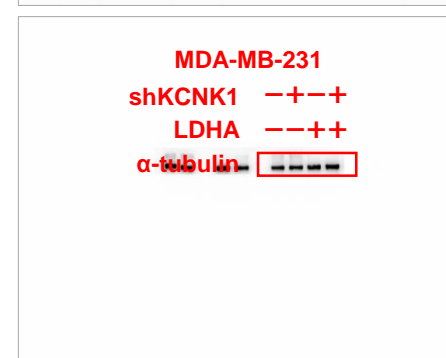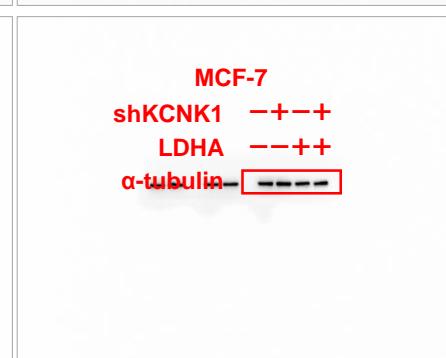

### Supplementary Fig. S2b repeat 1

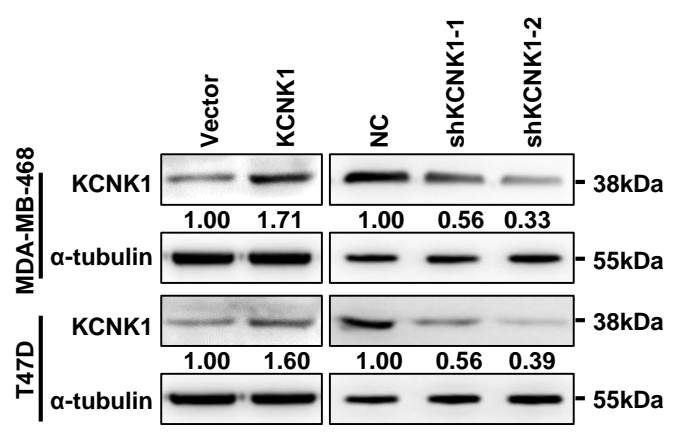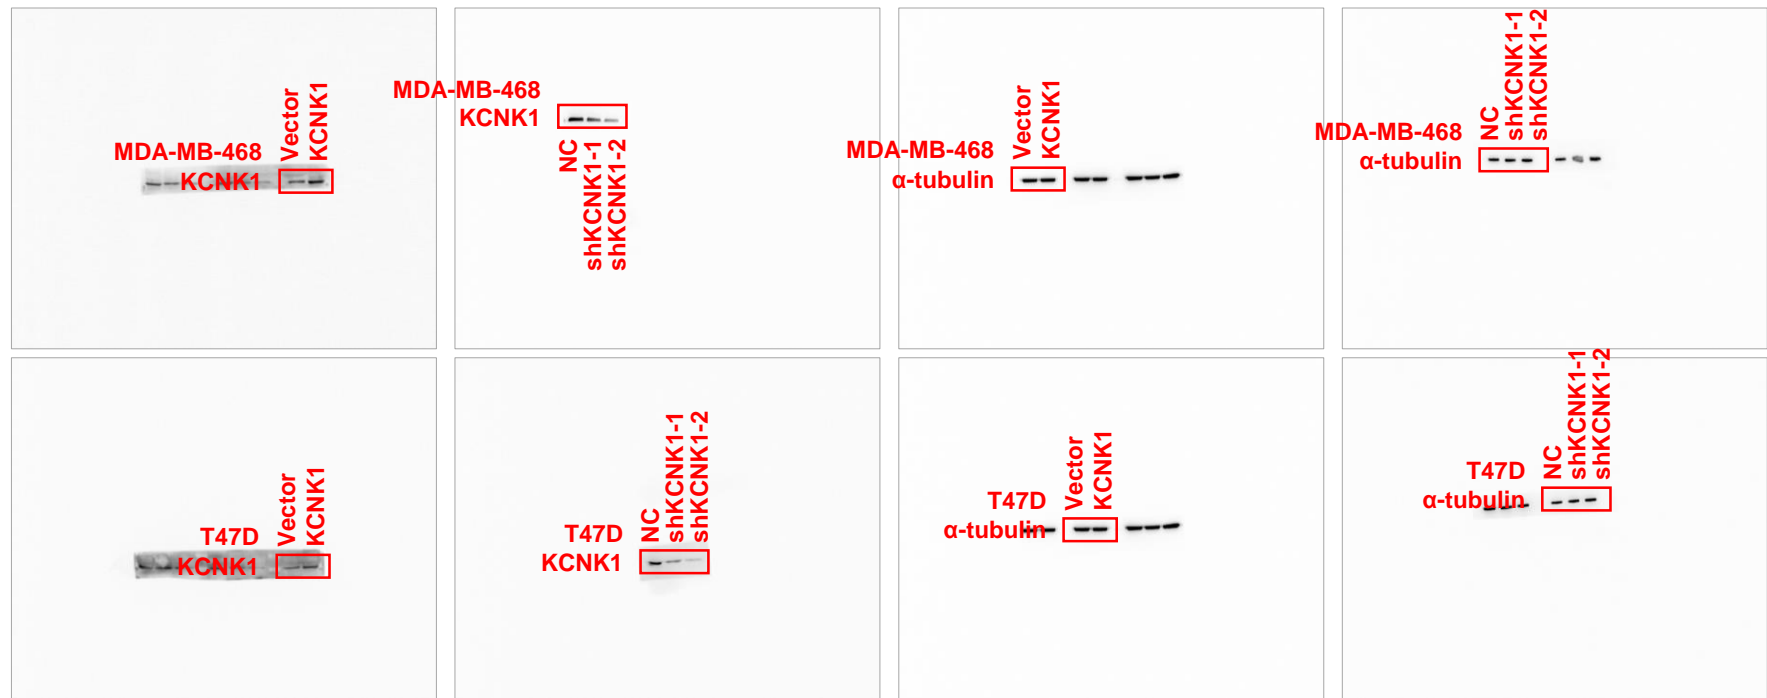

### Supplementary Fig. S2b repeat 2

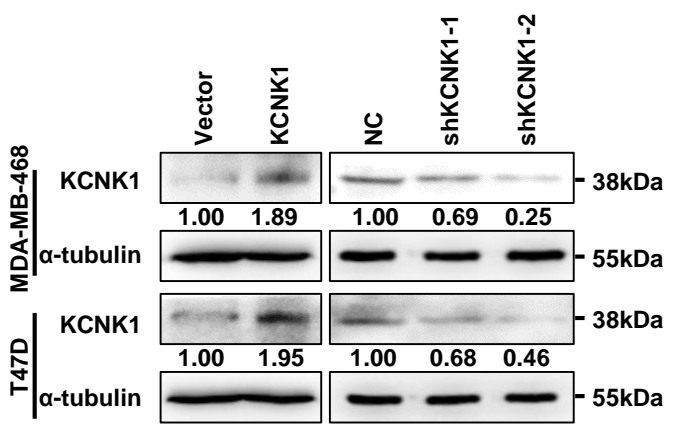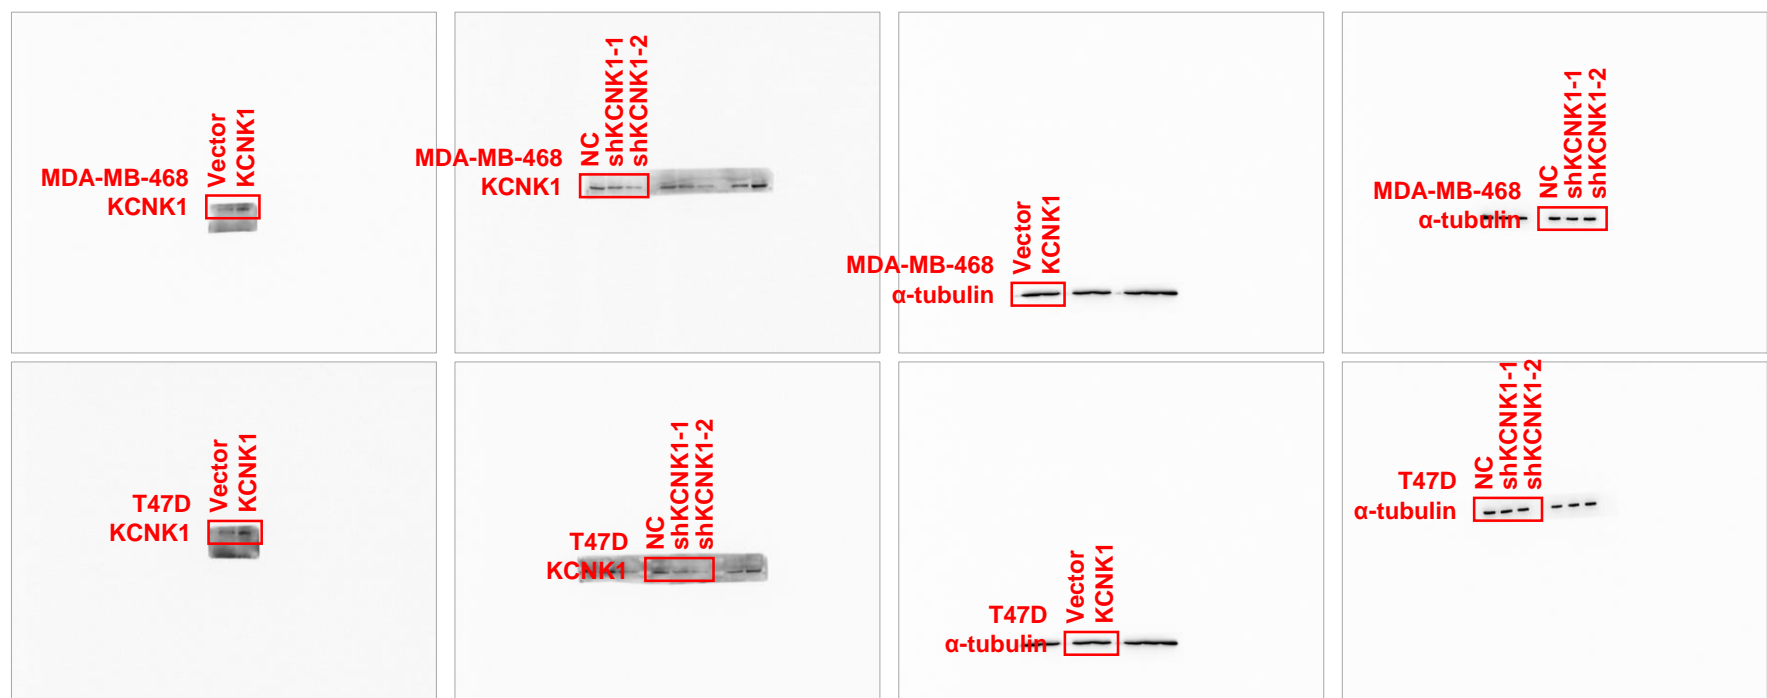

# Supplementary Fig. S2b repeat 3

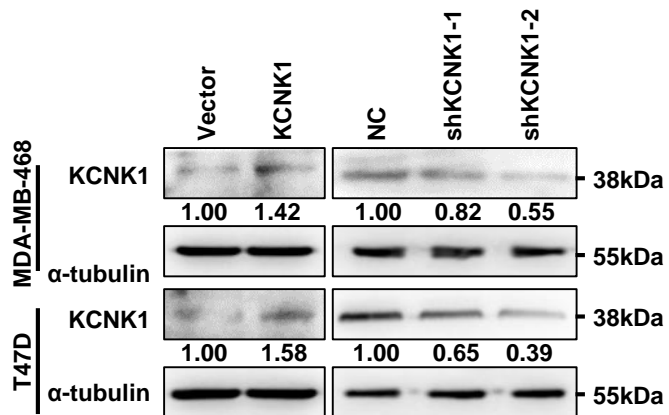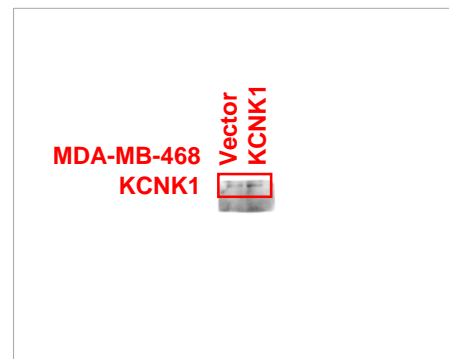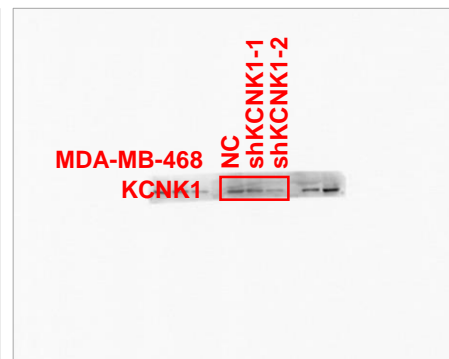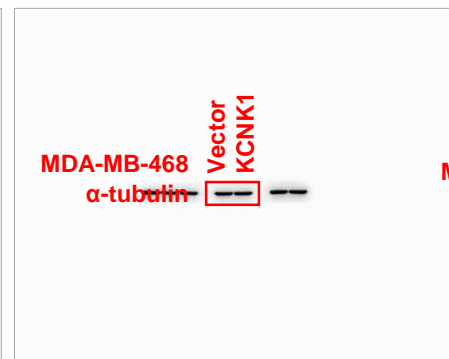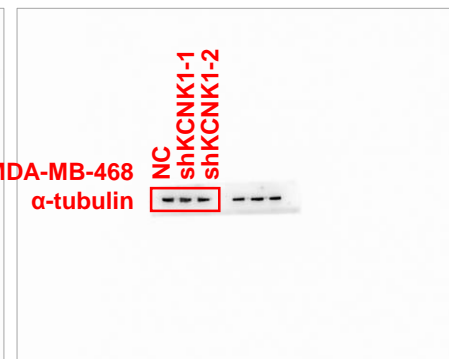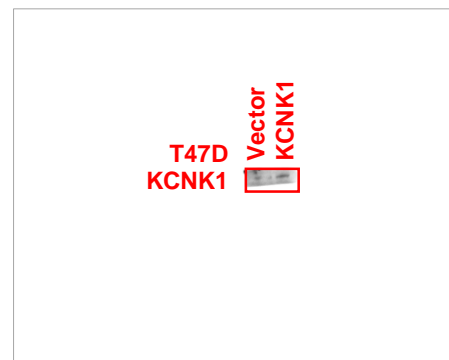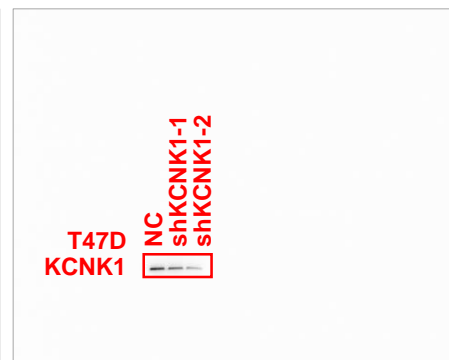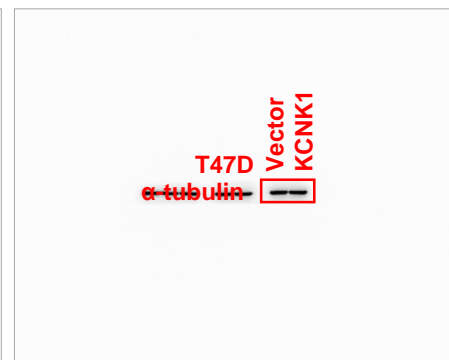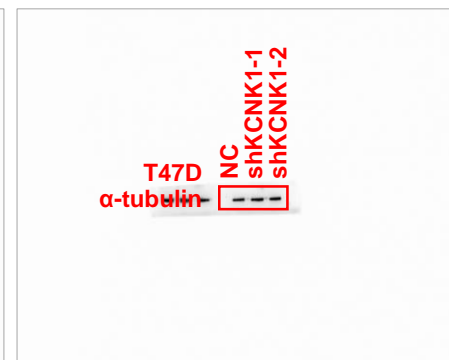

# Supplementary Fig. S9a repeat 1

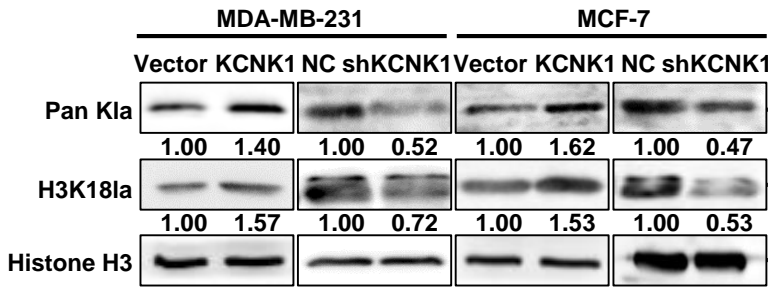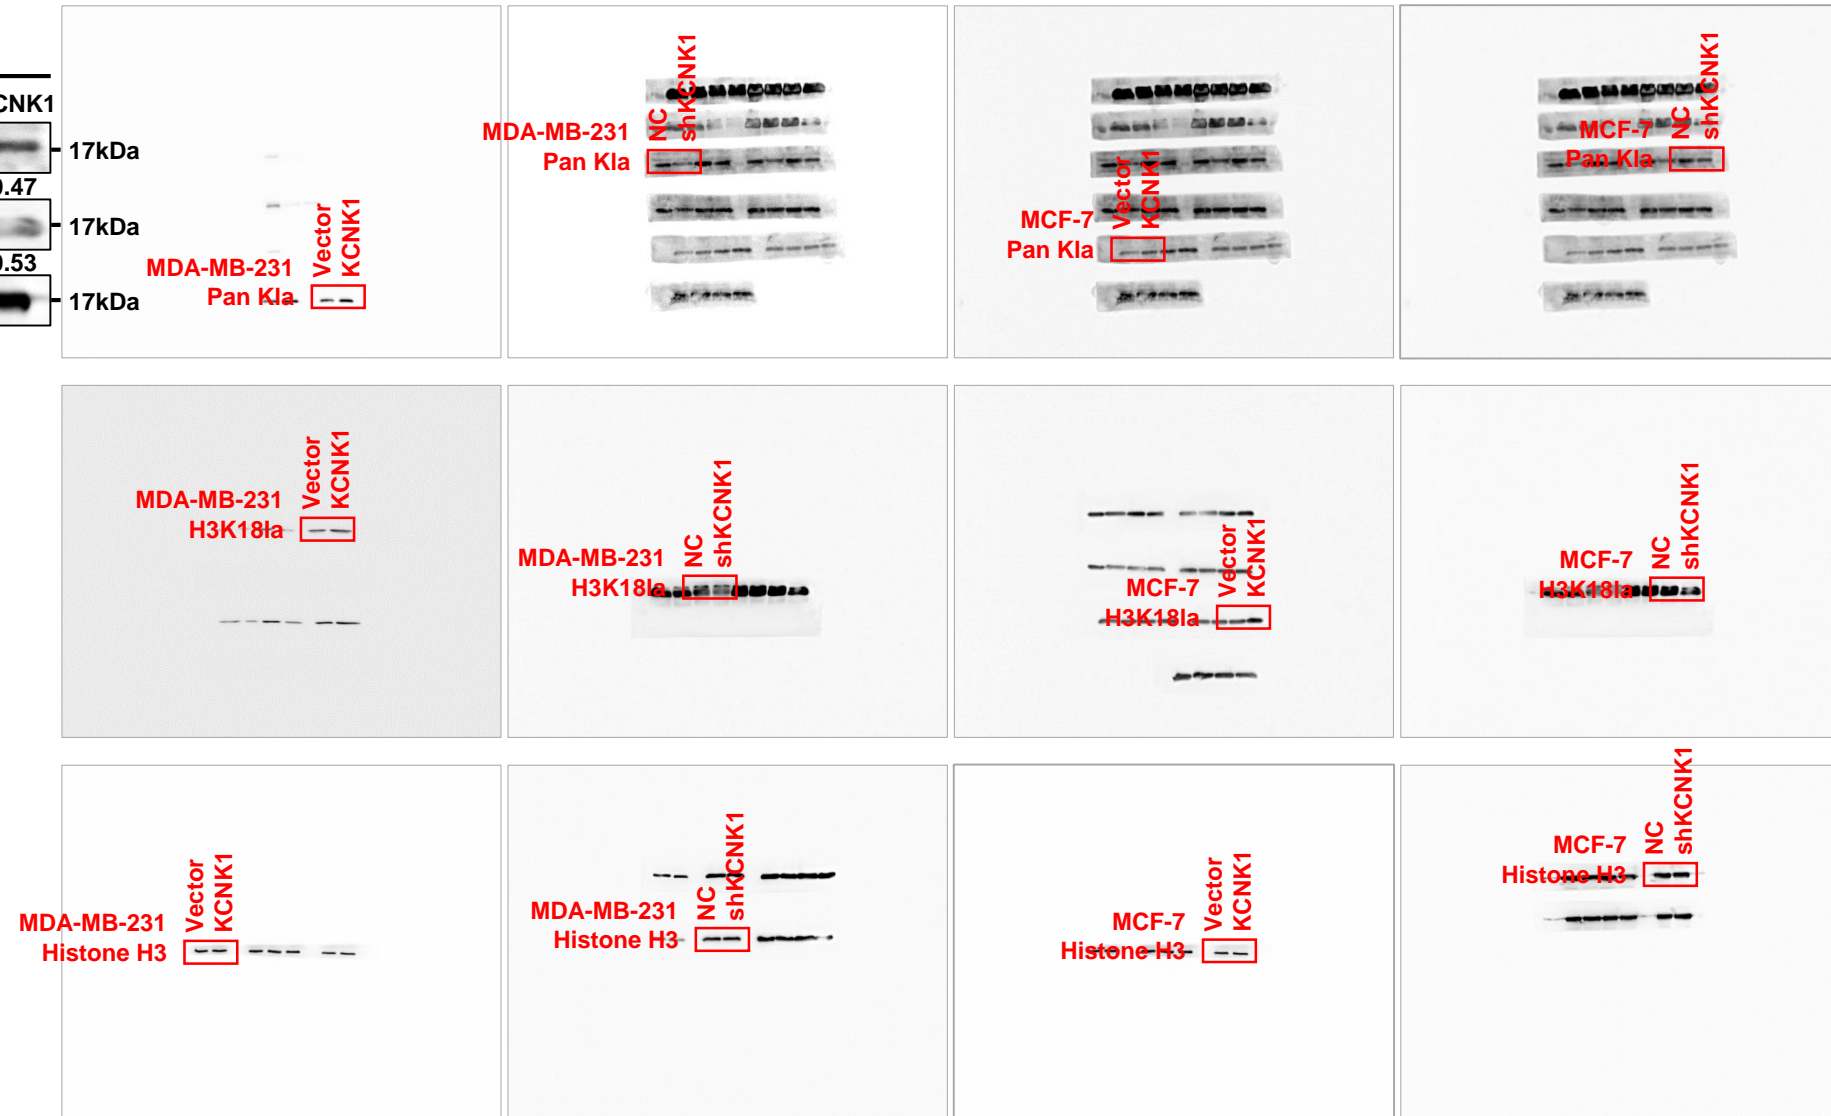

## Supplementary Fig. S9a repeat 2

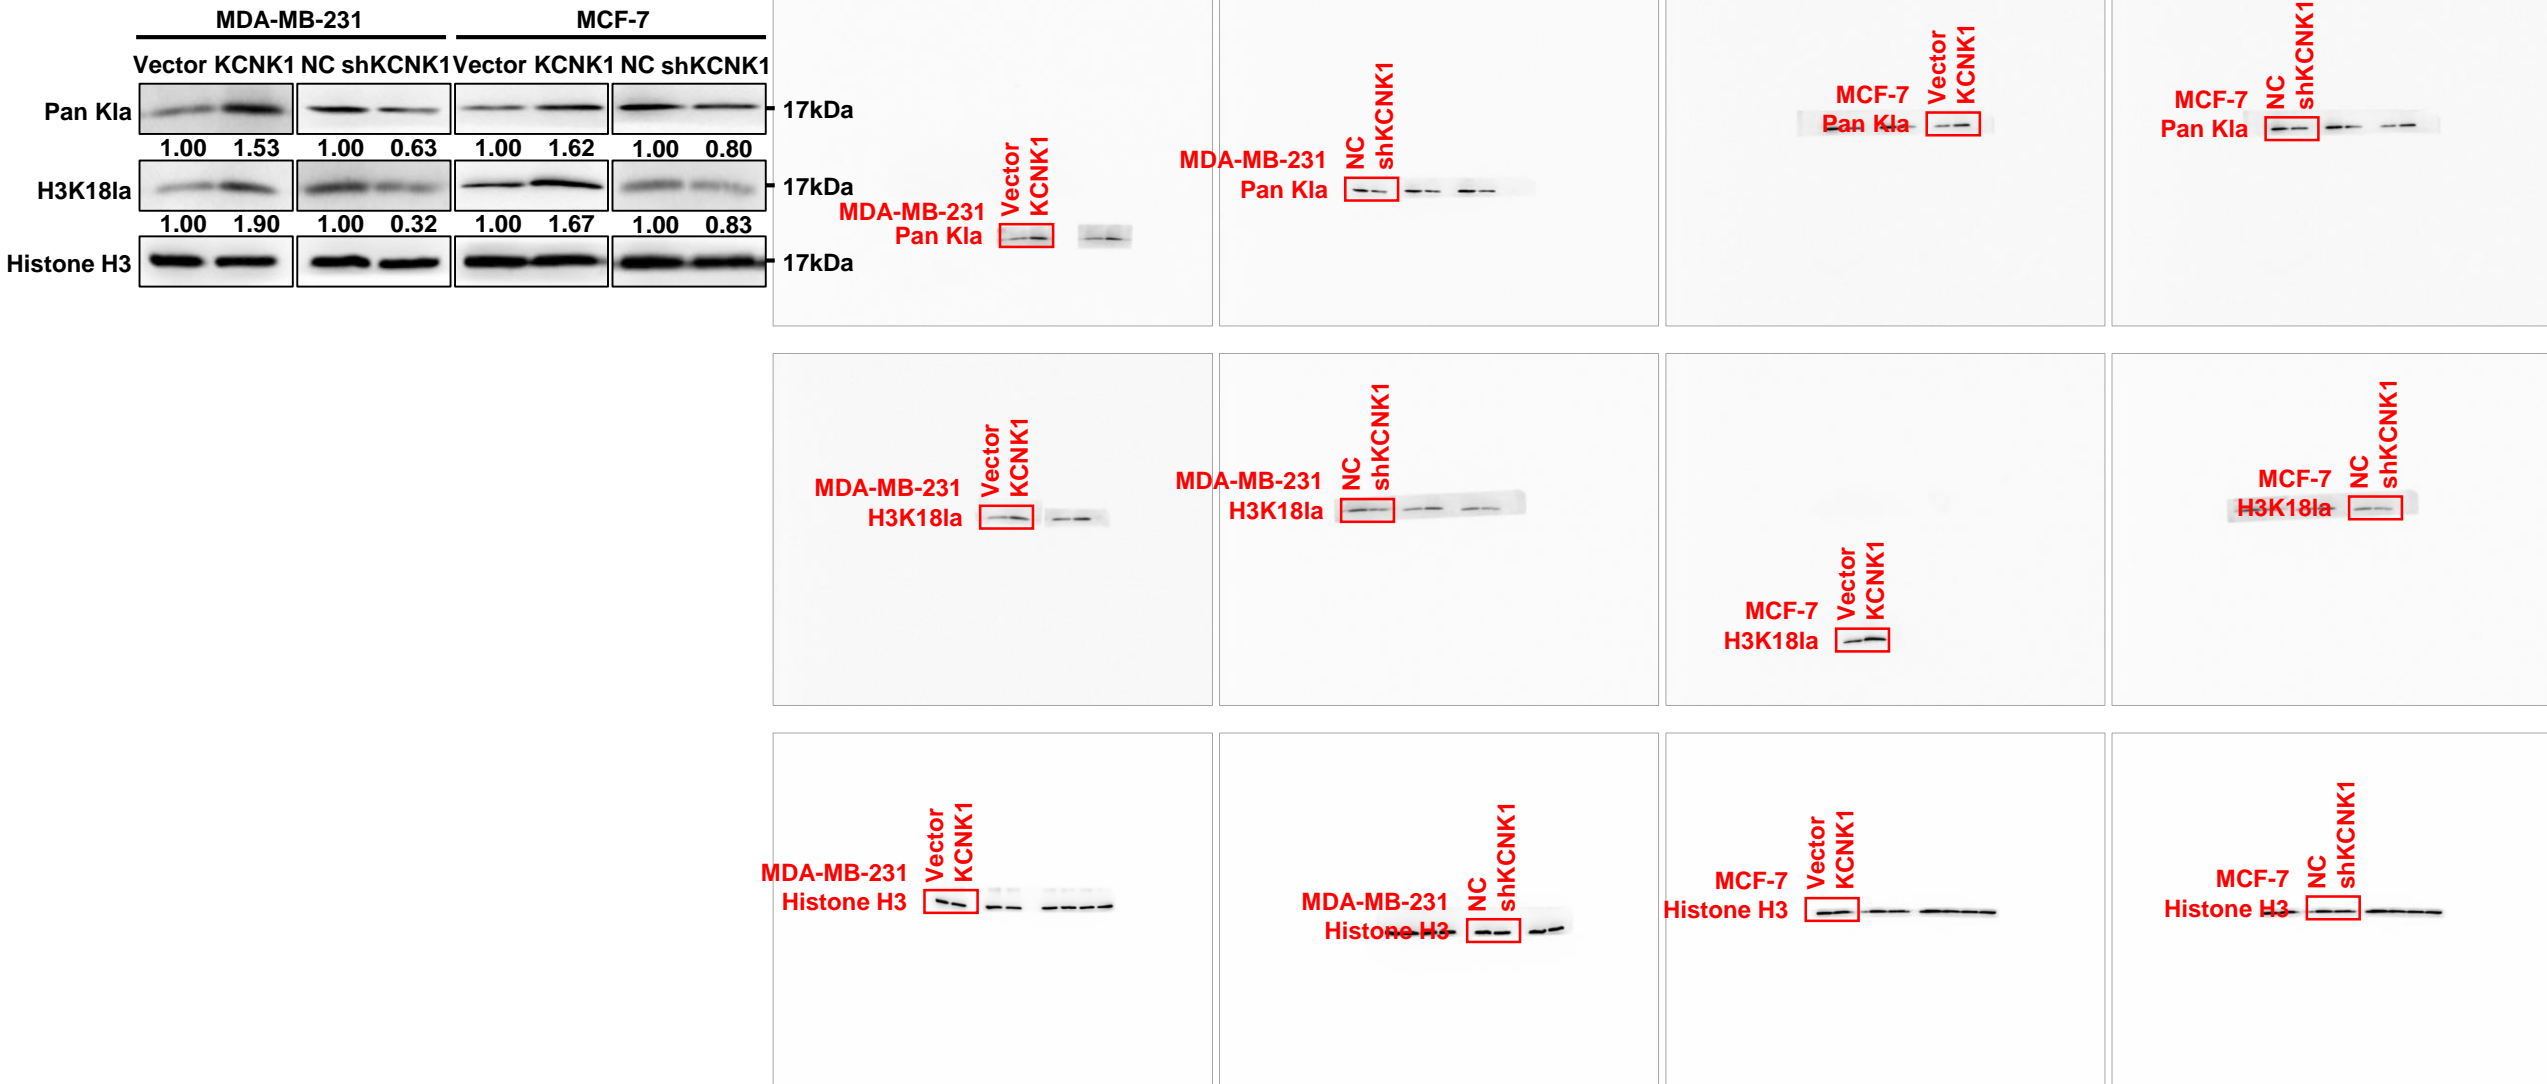

# Supplementary Fig. S9a repeat 3

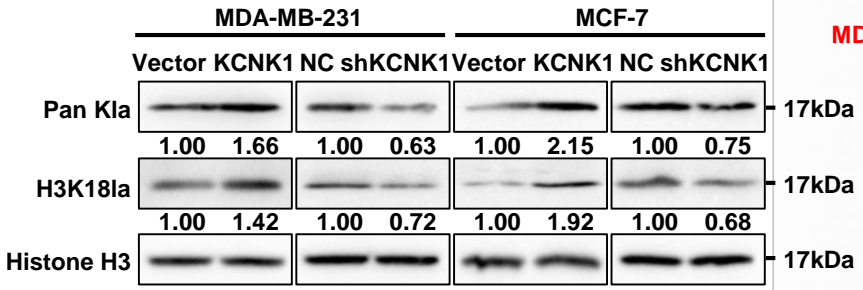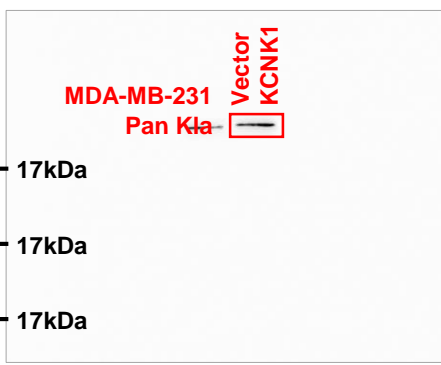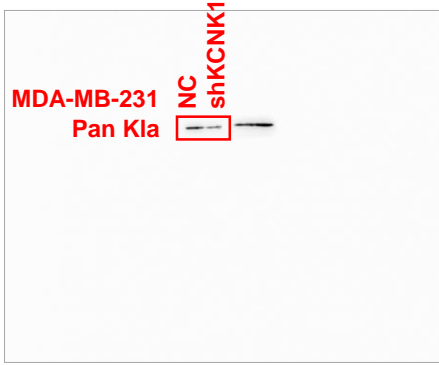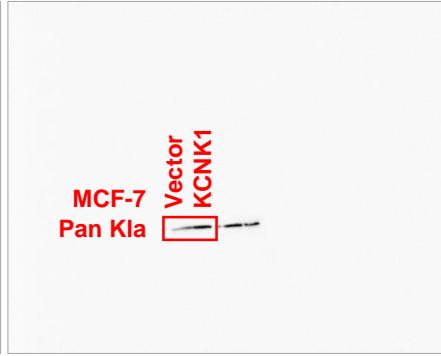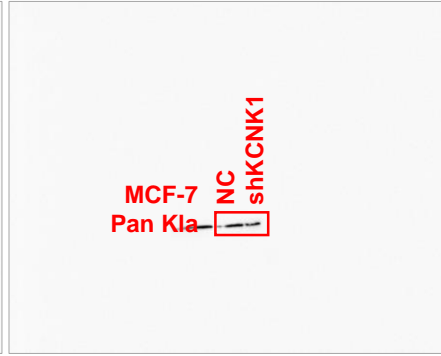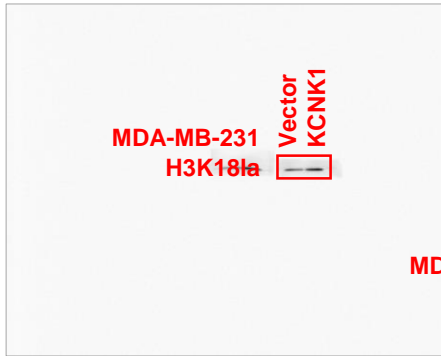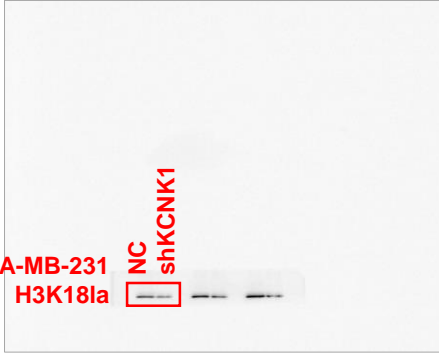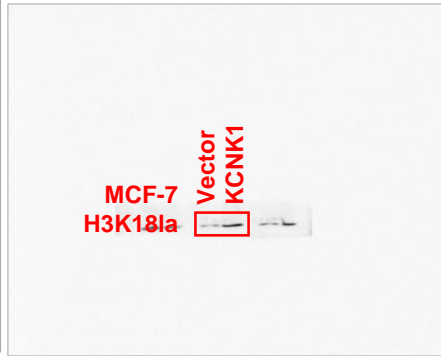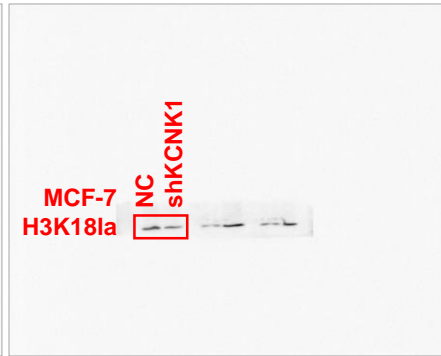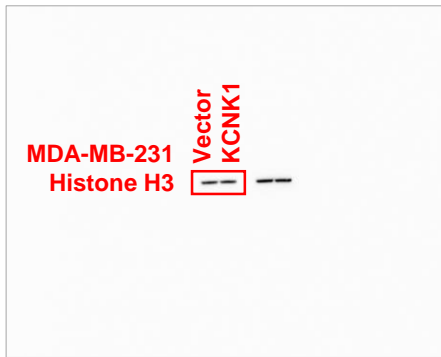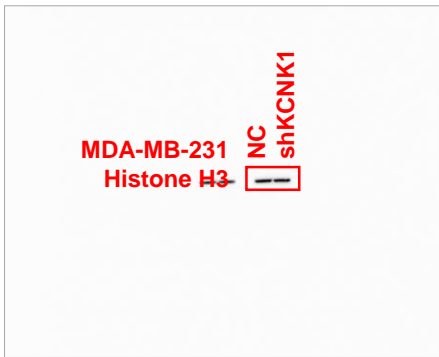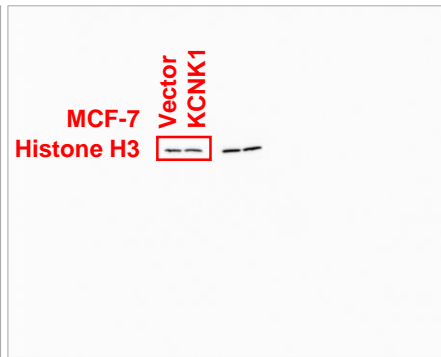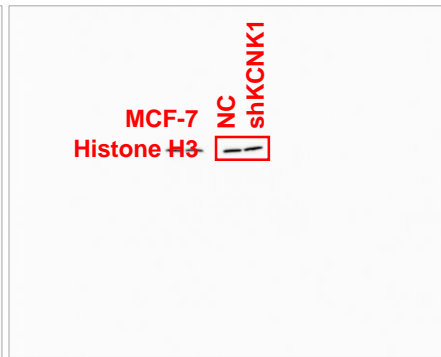



# Supplementary Fig. S9e repeat 1

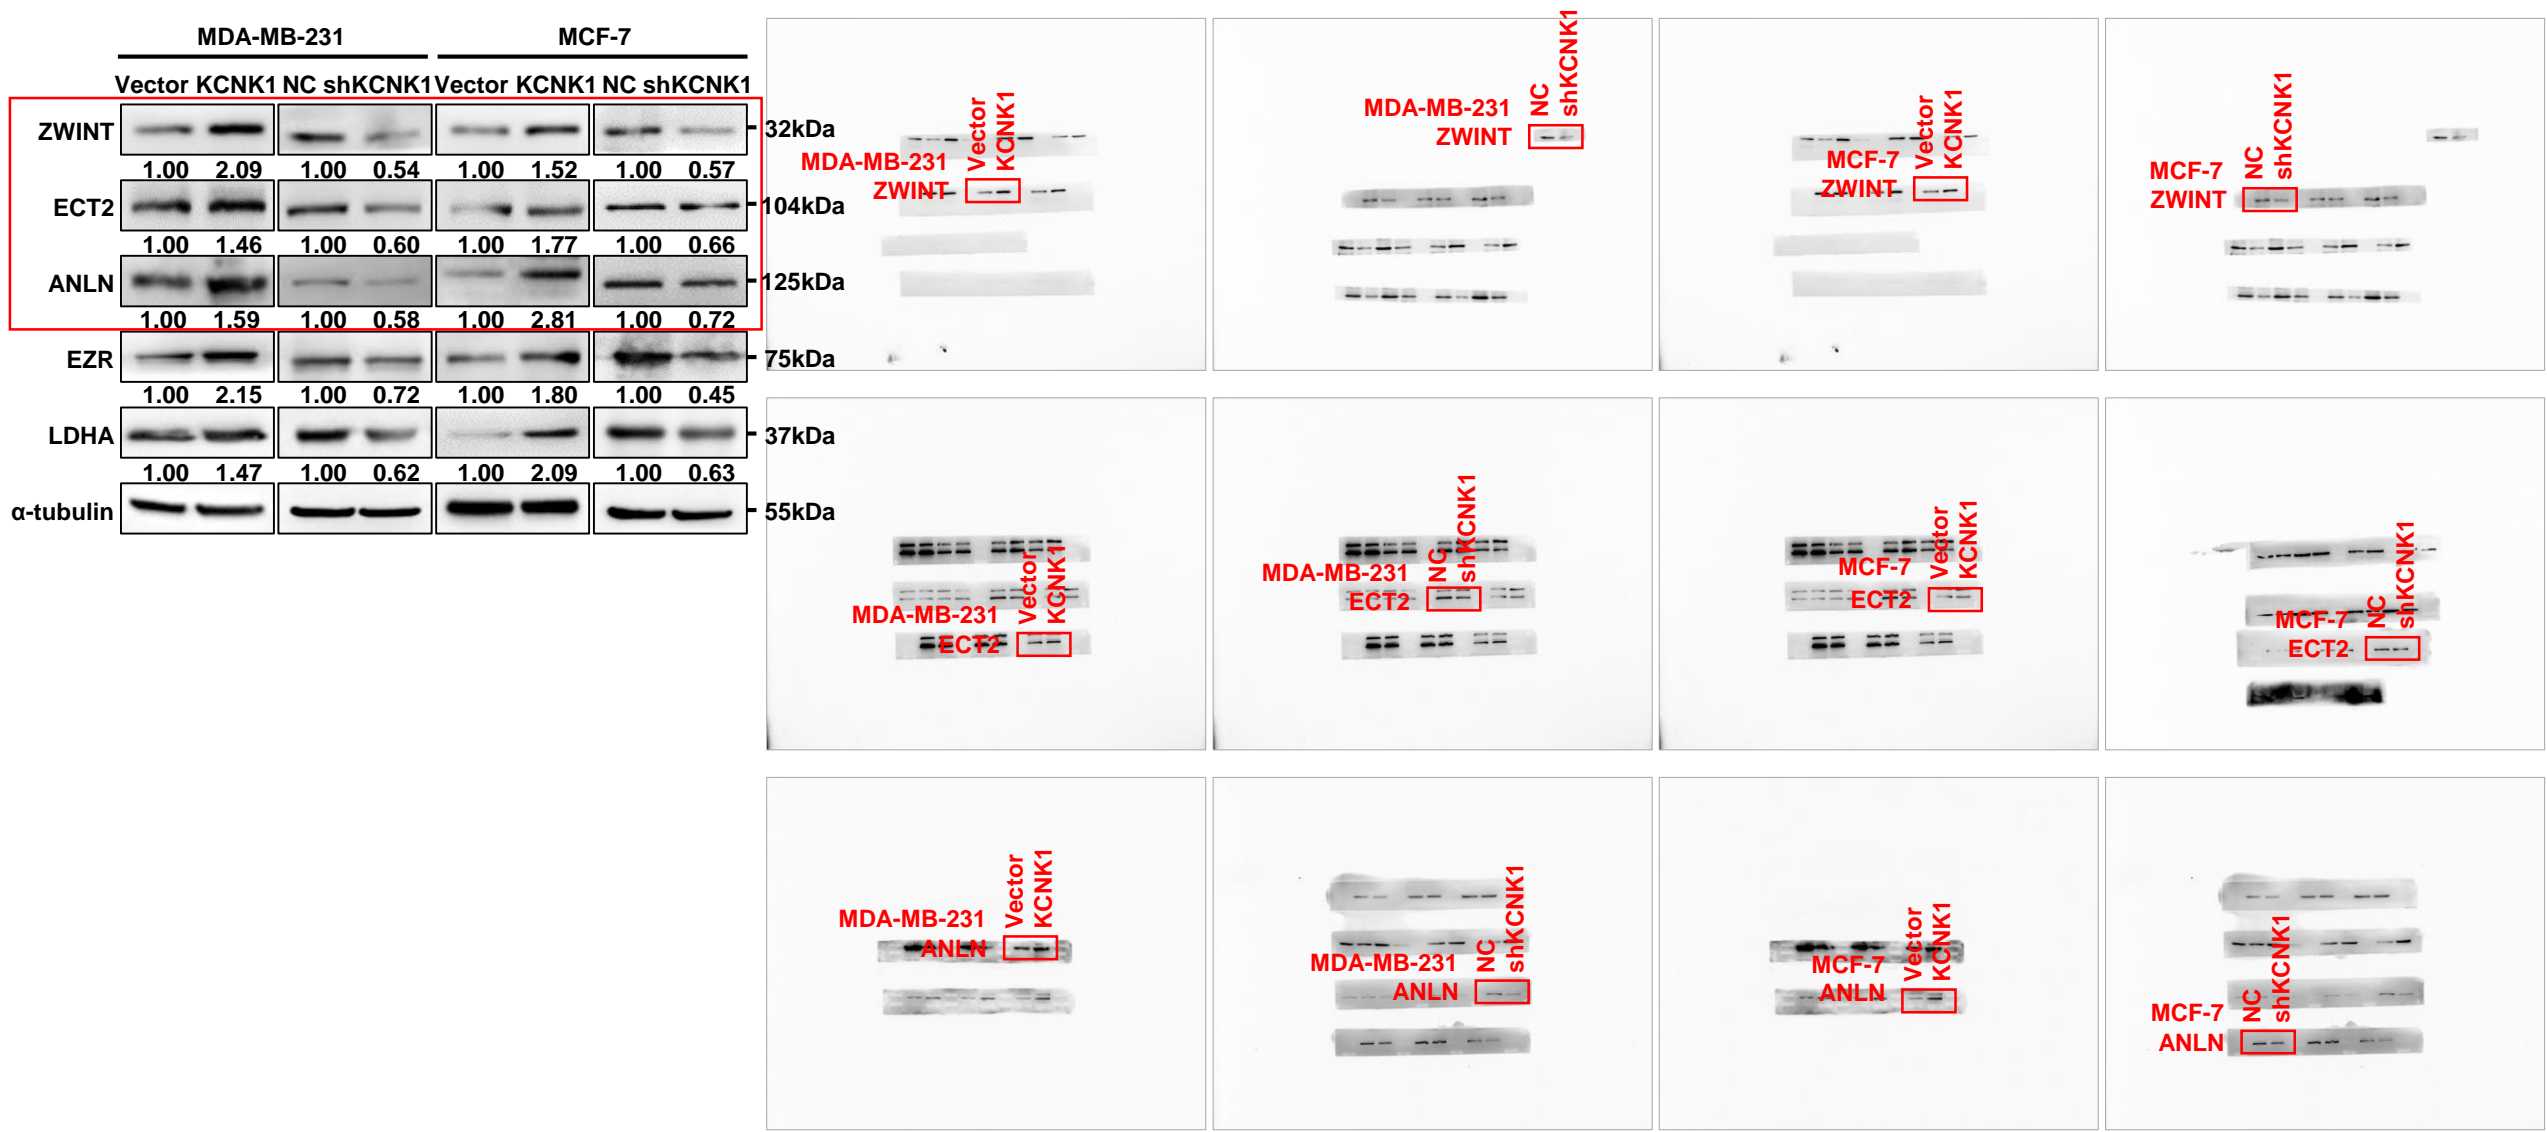

# Supplementary Fig. S9e repeat 1

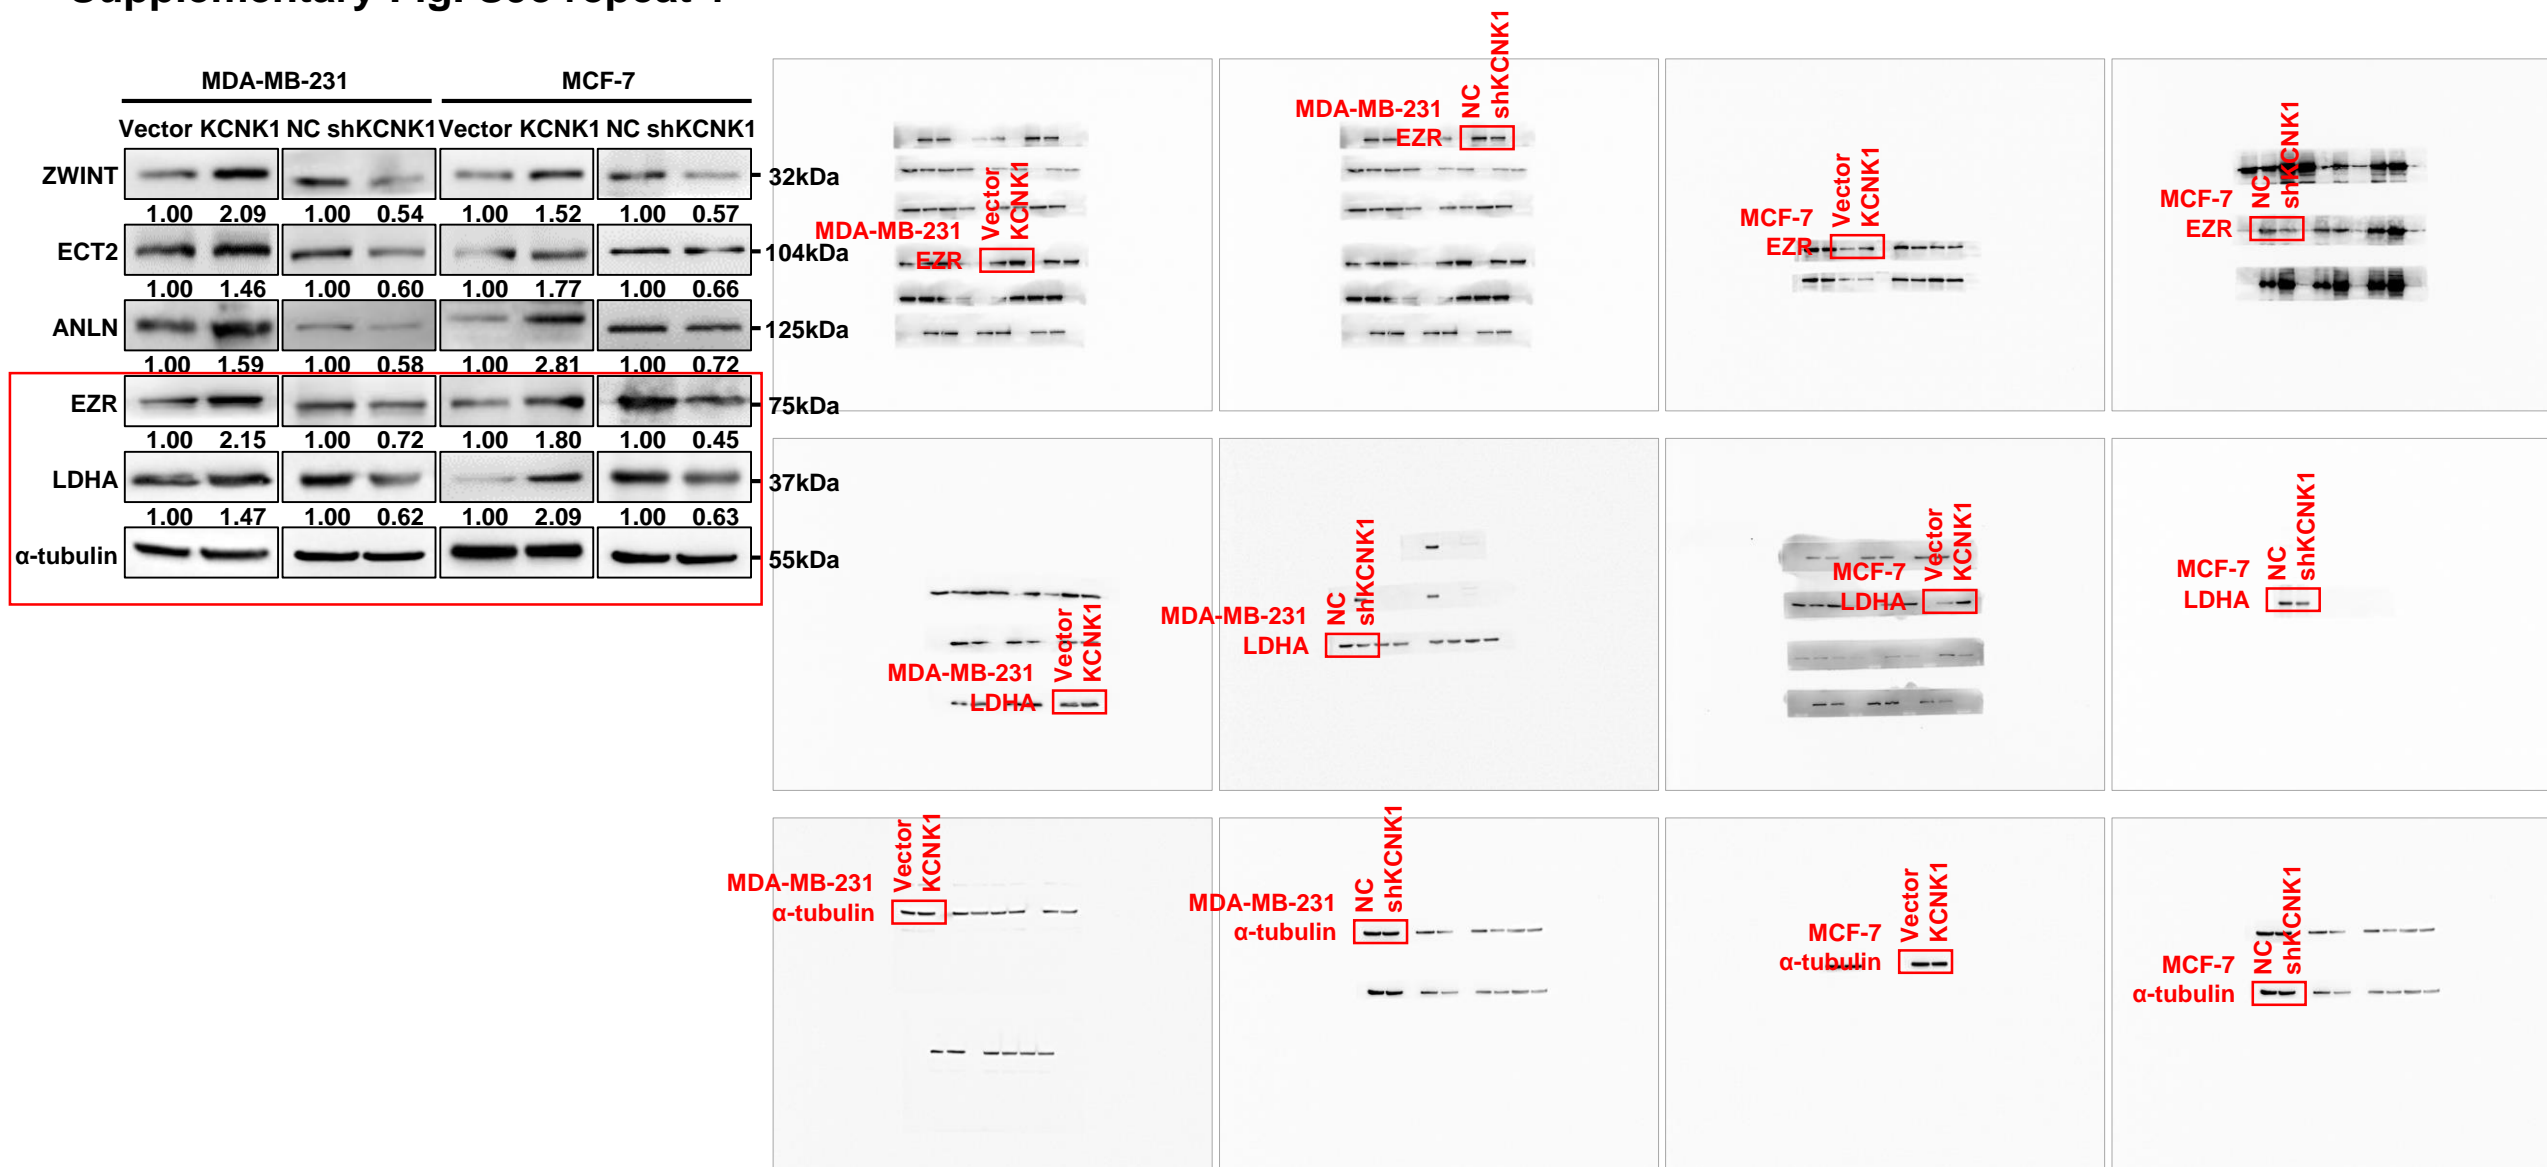



# Supplementary Fig. S9e repeat 2

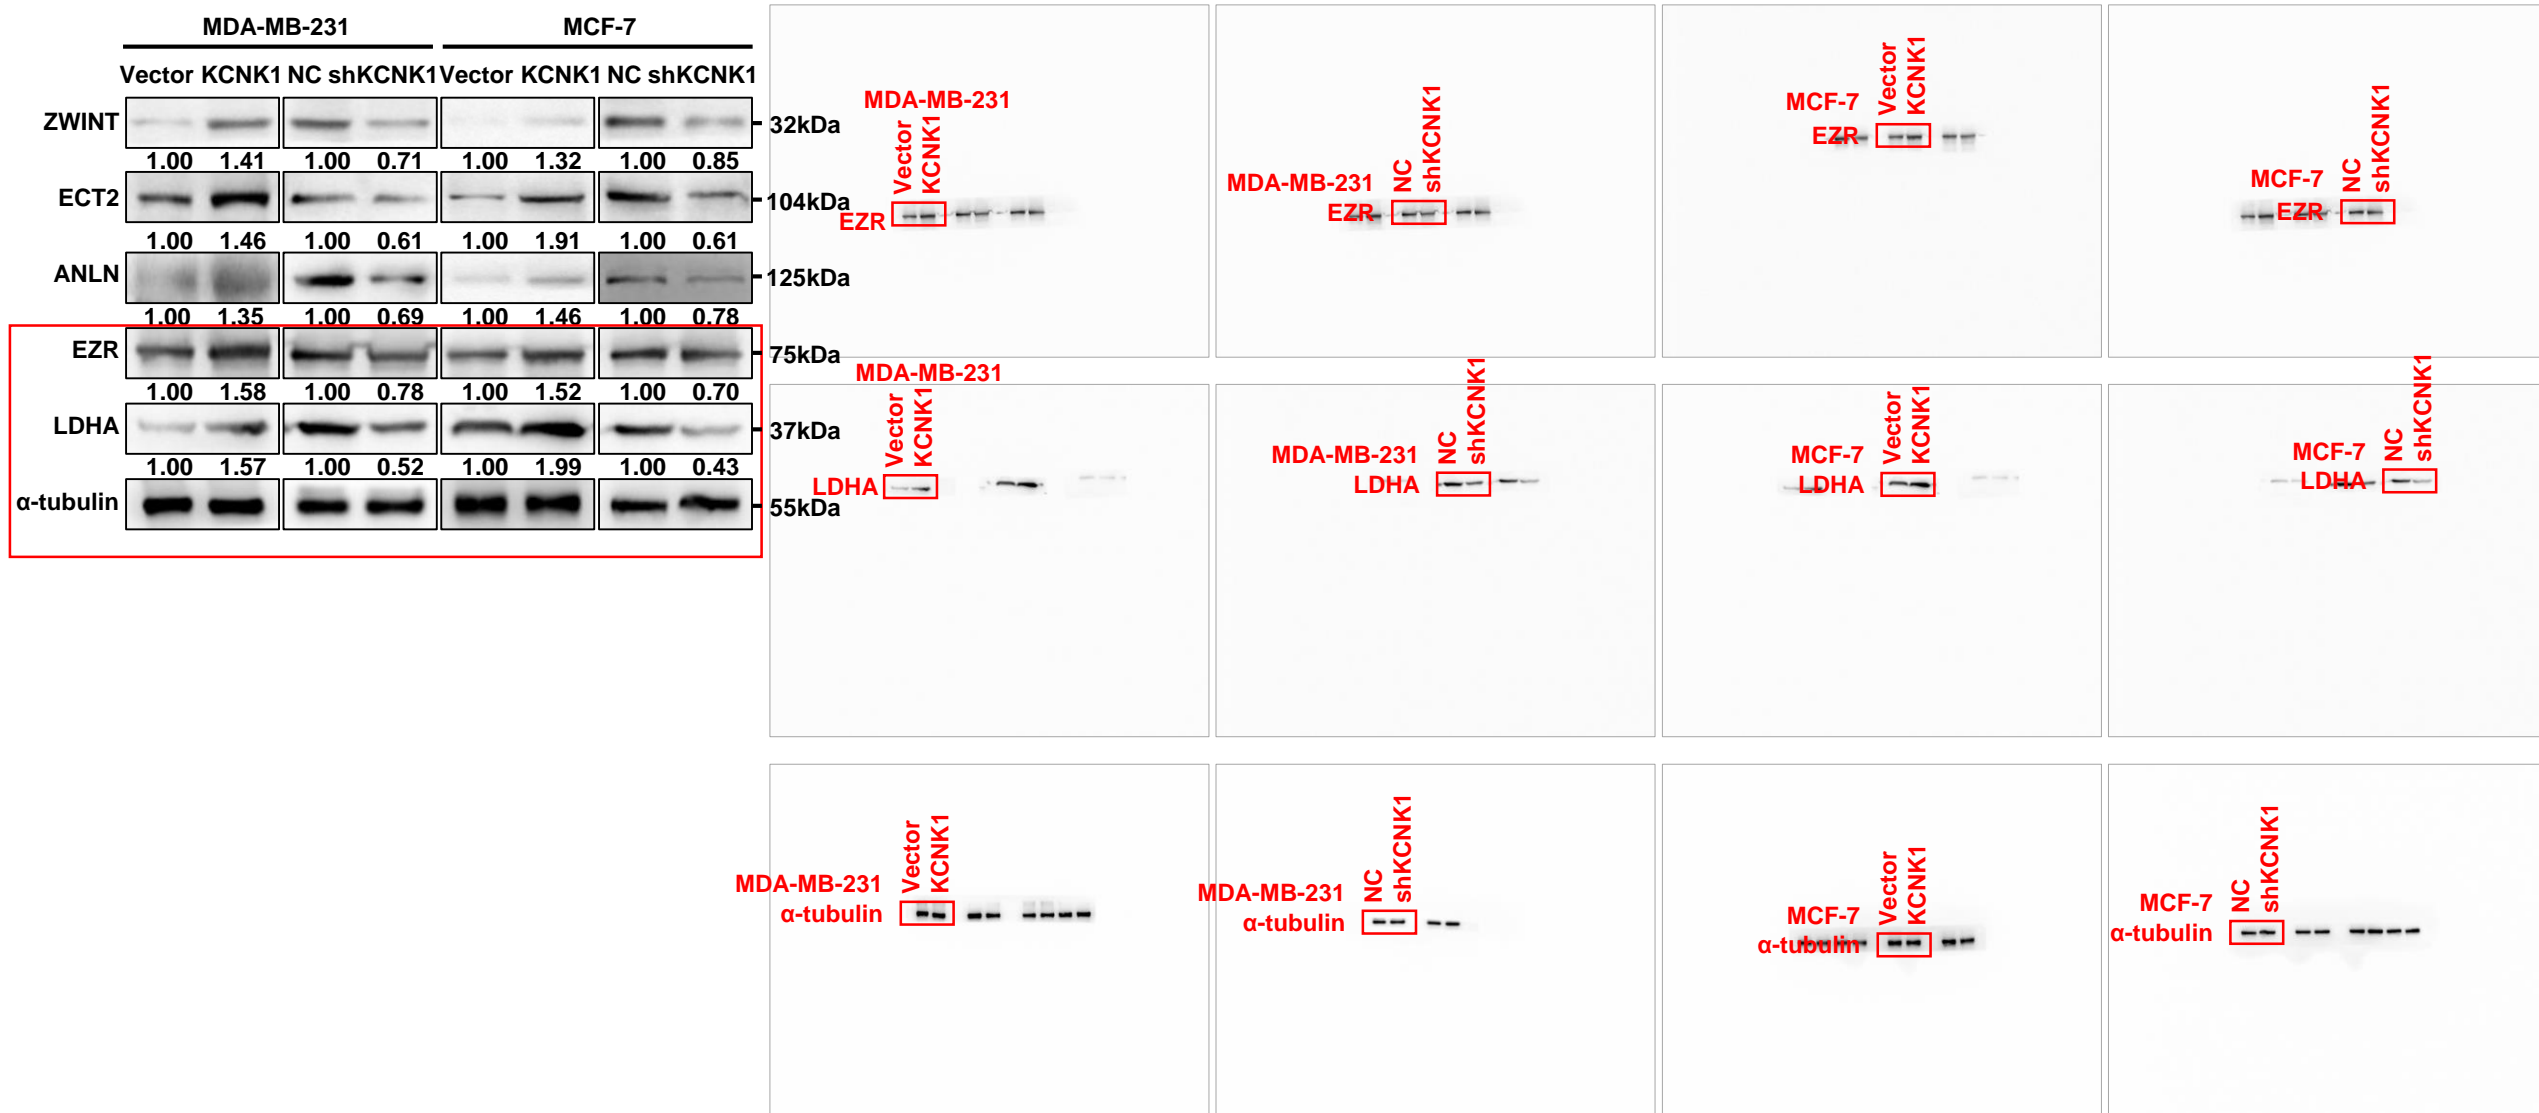

# Supplementary Fig. S9e repeat 3

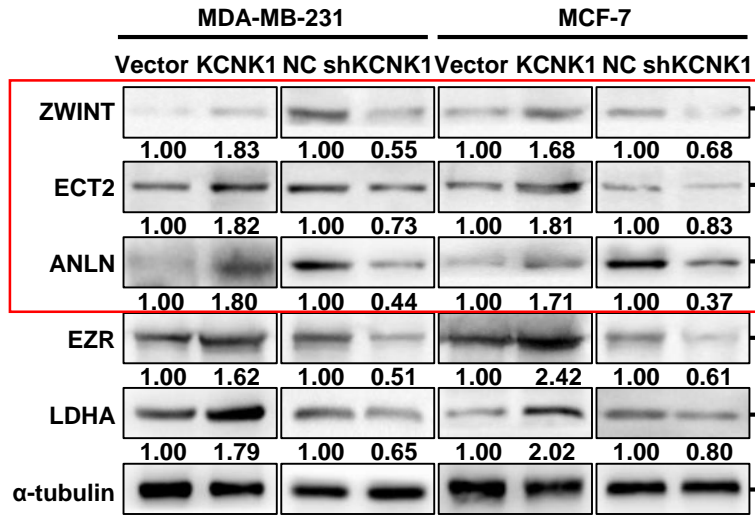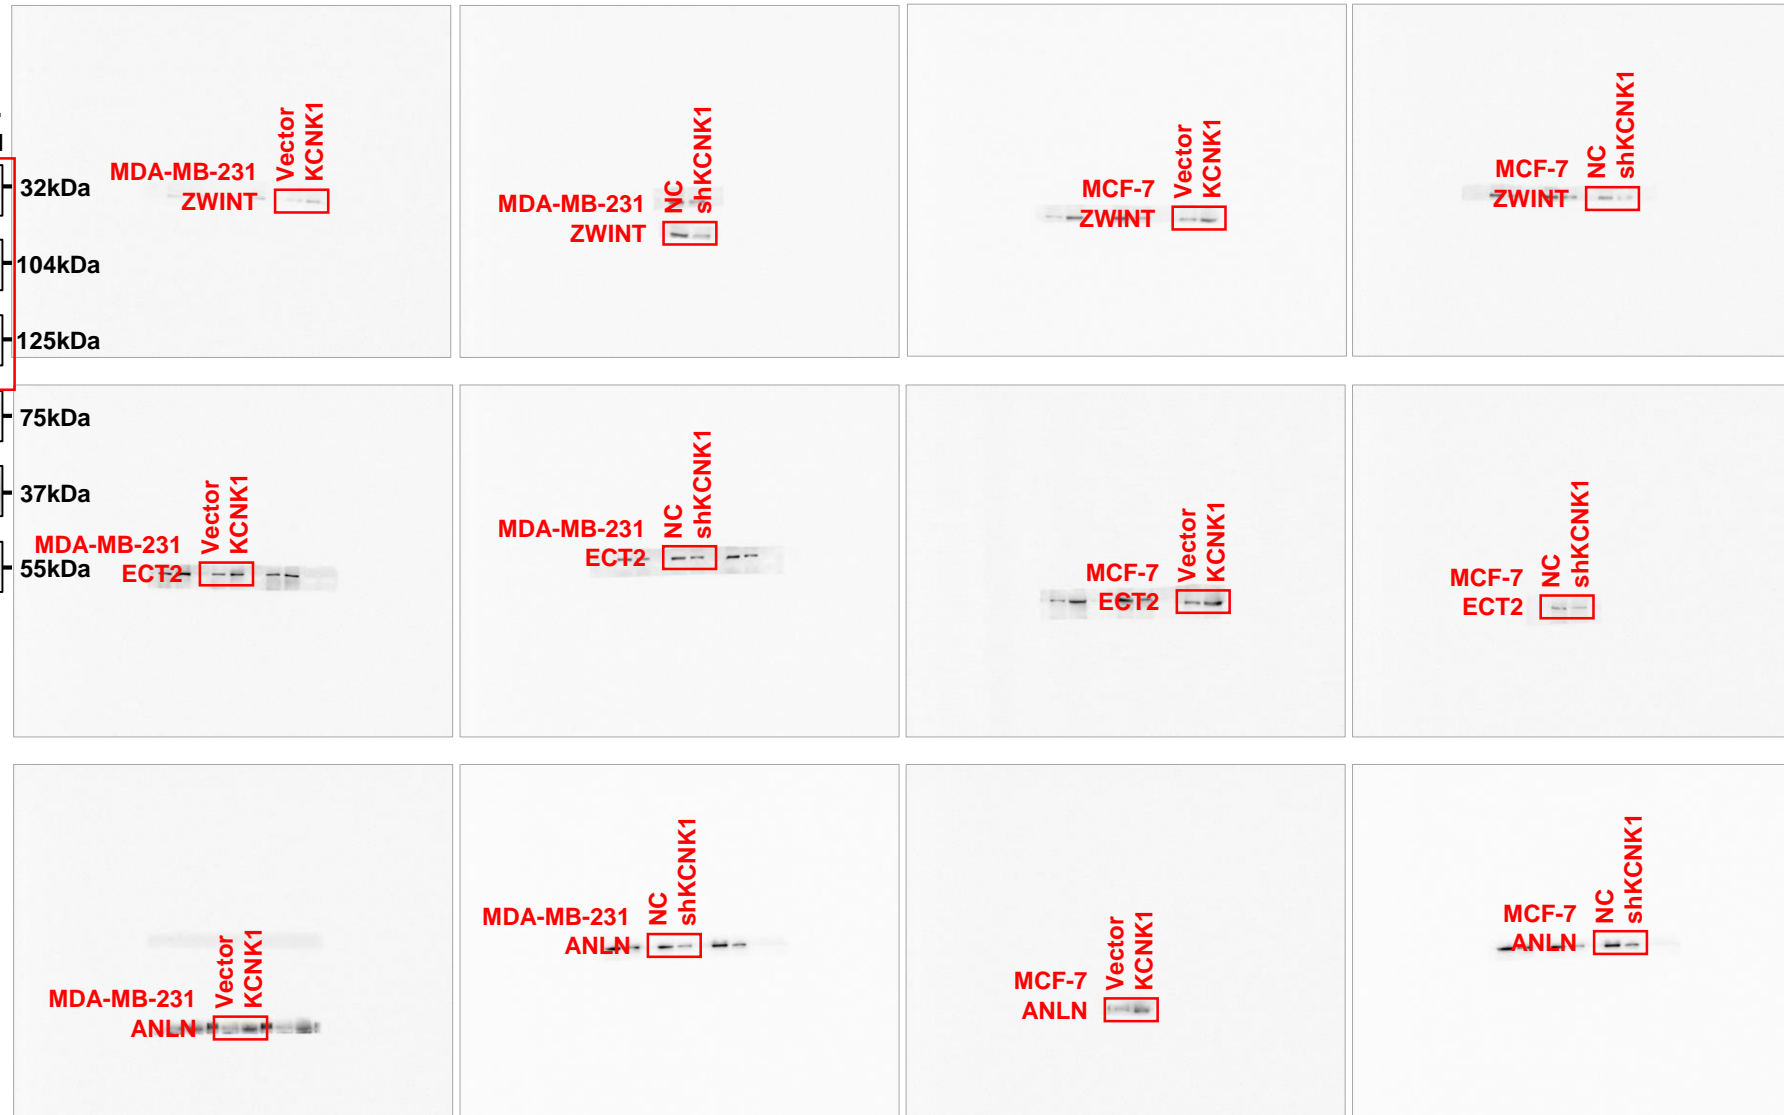

# Supplementary Fig. S9e repeat 3

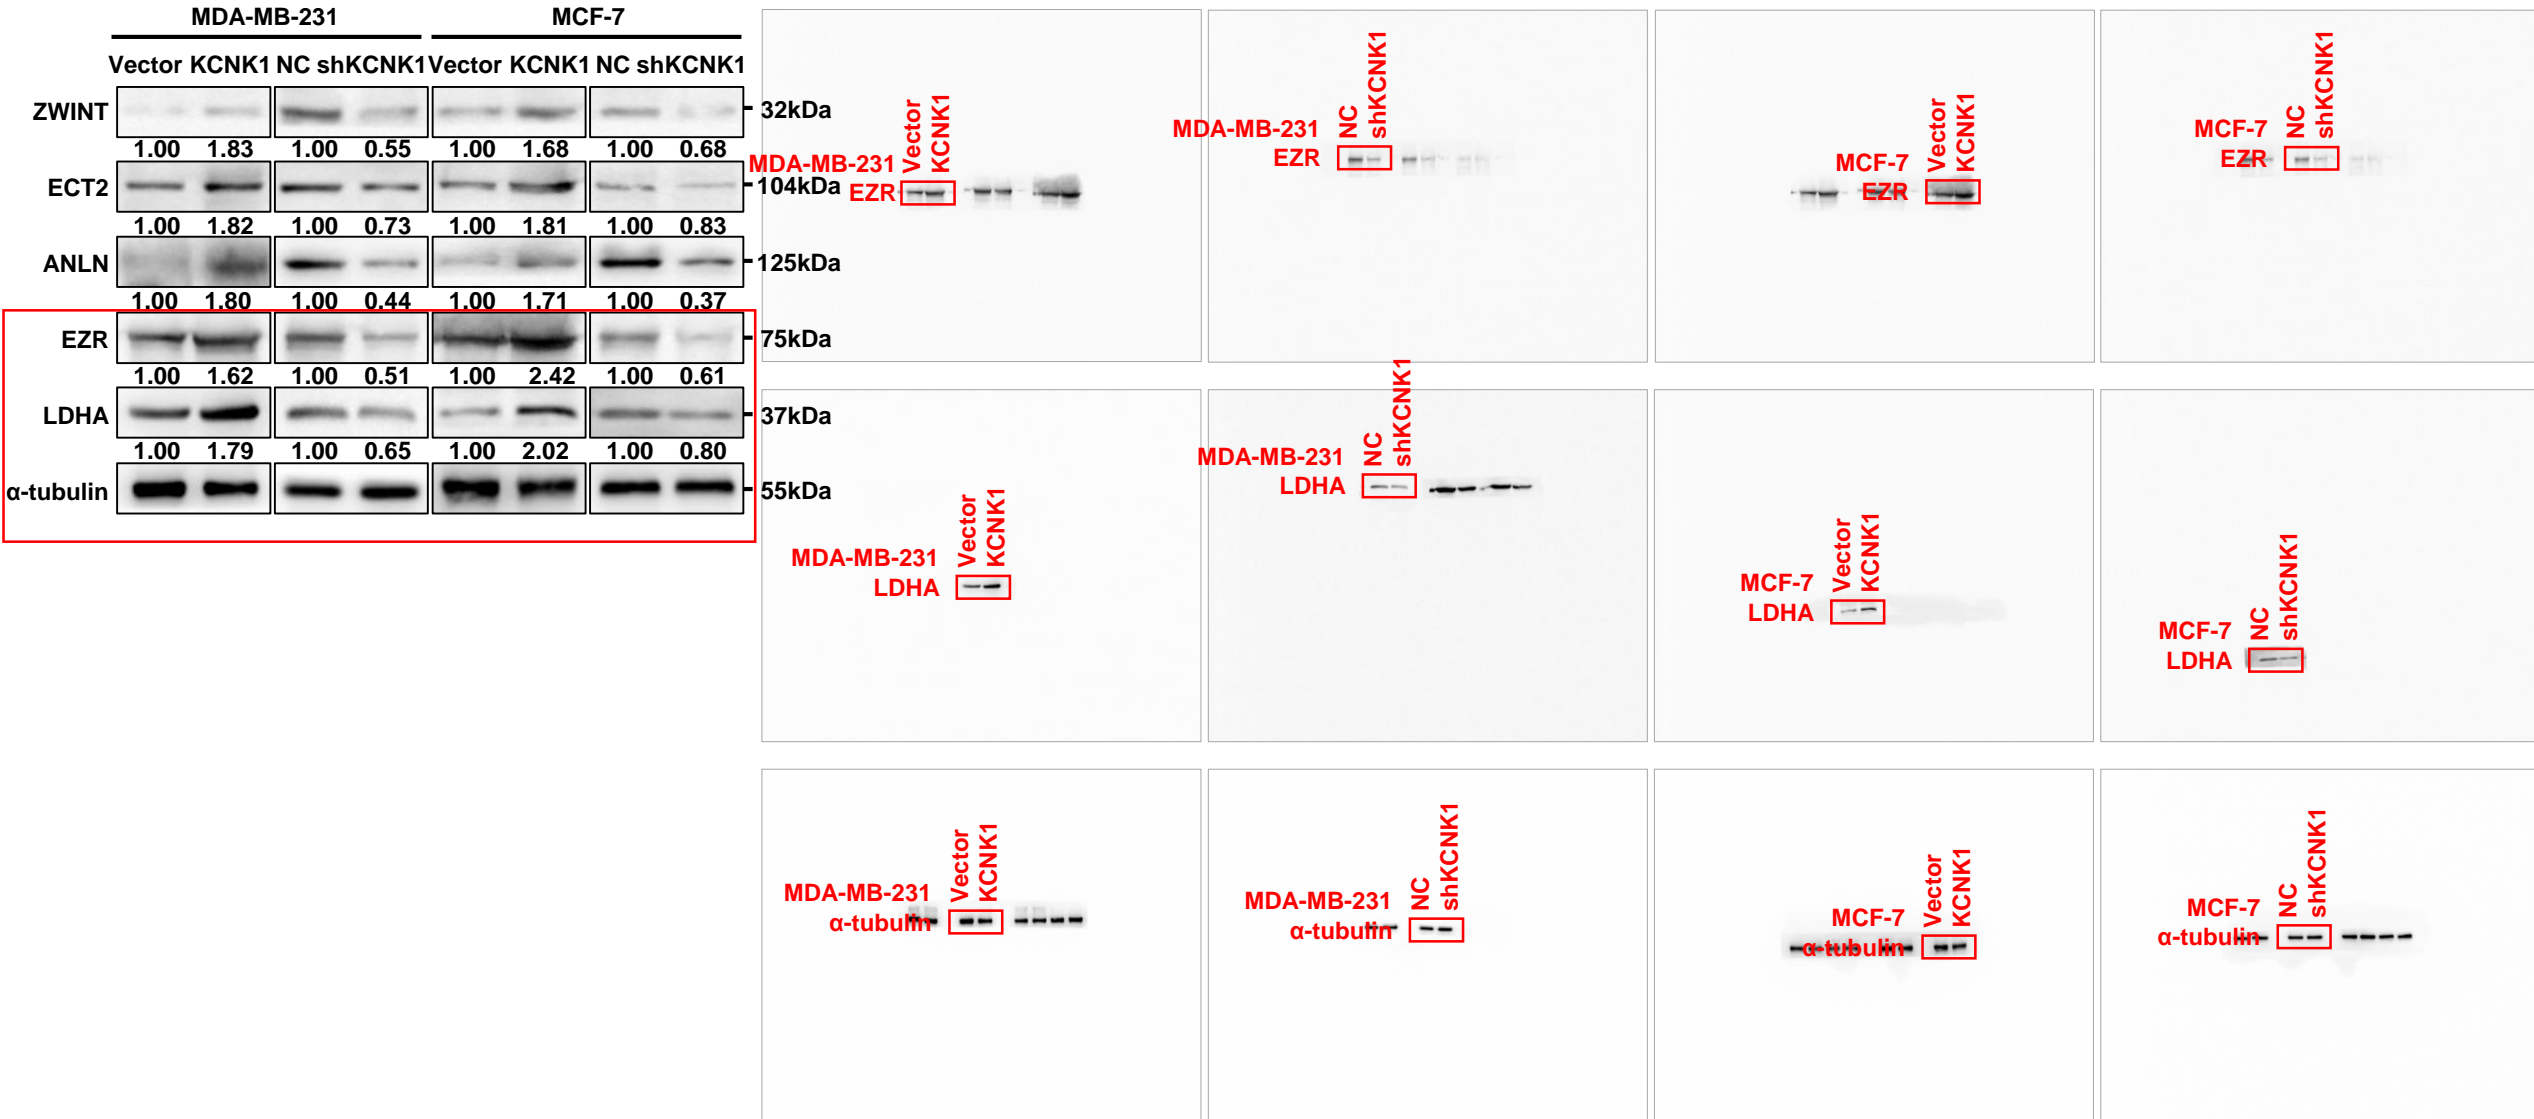

### Supplementary Fig. S10a repeat 1

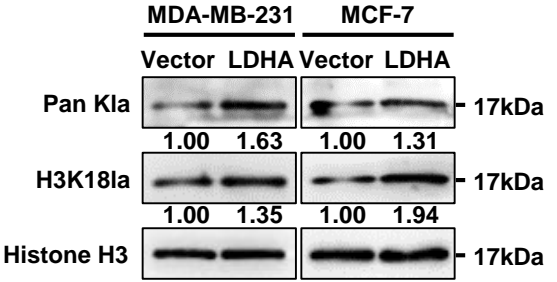

### Supplementary Fig. S10a repeat 2

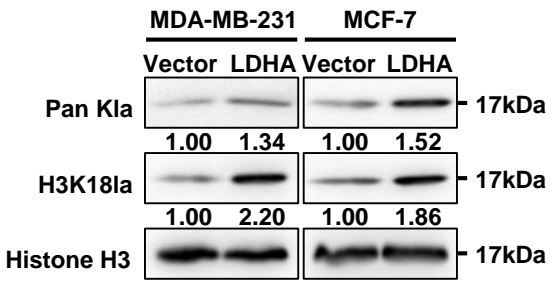

### Supplementary Fig. S10a repeat 3

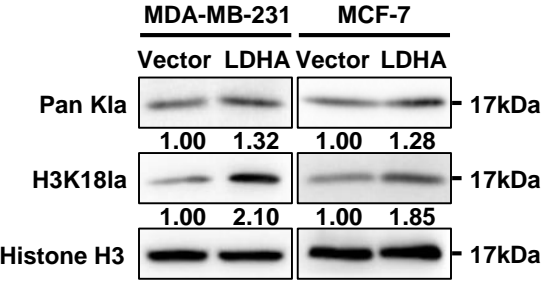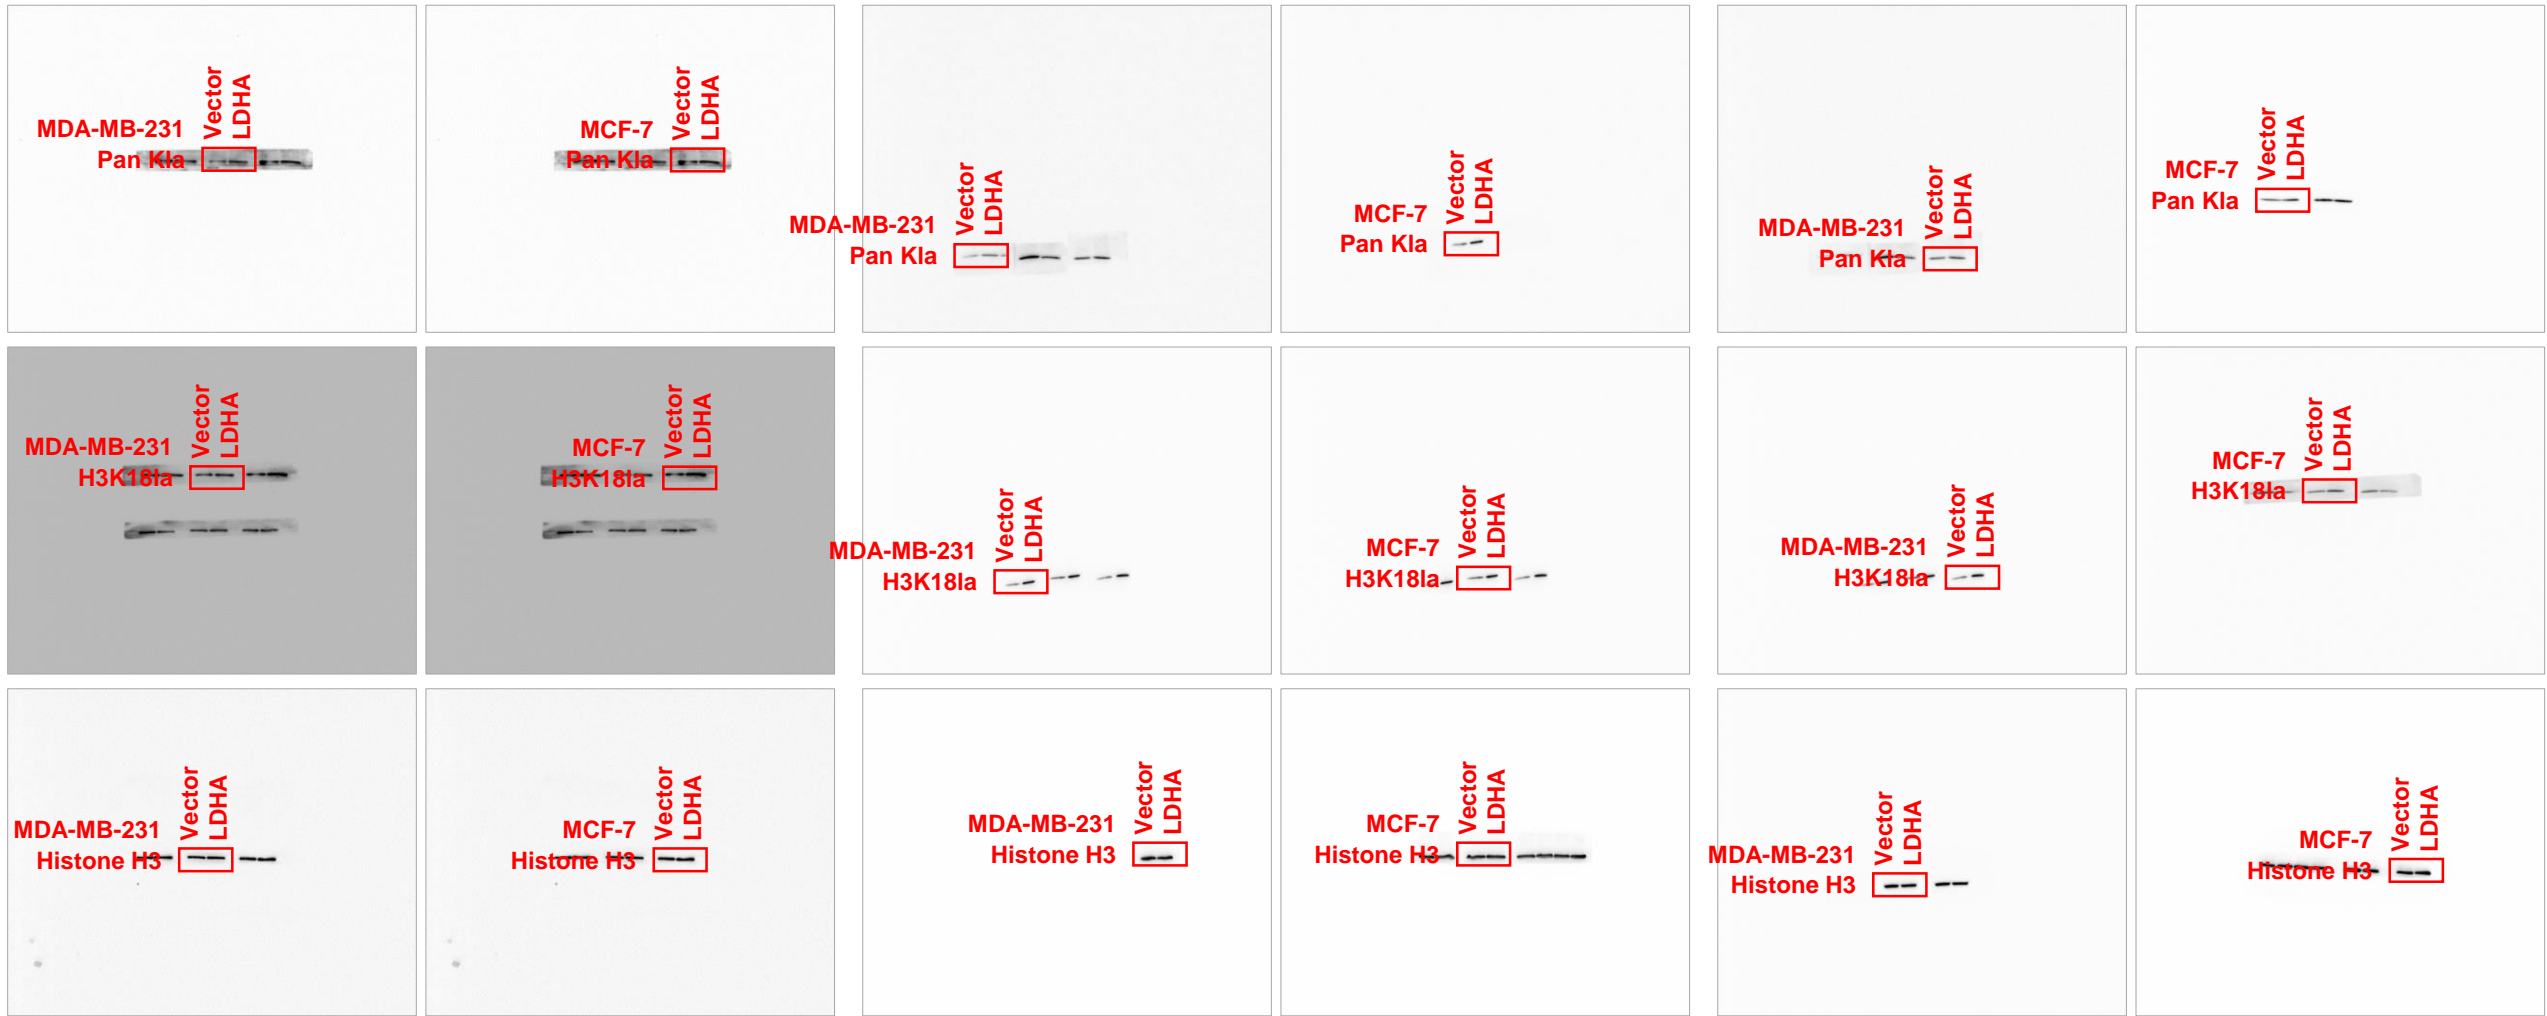

# Supplementary Fig. S10e repeat 1

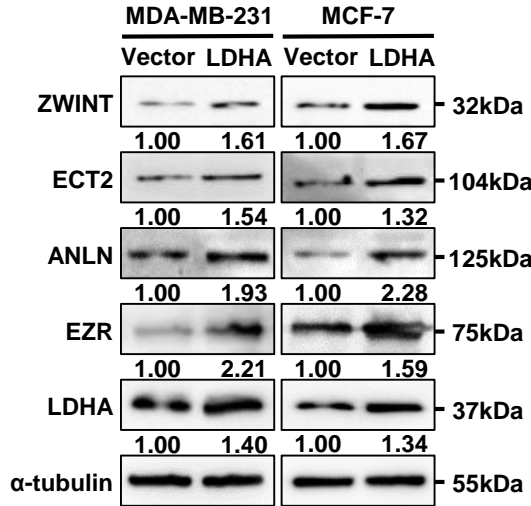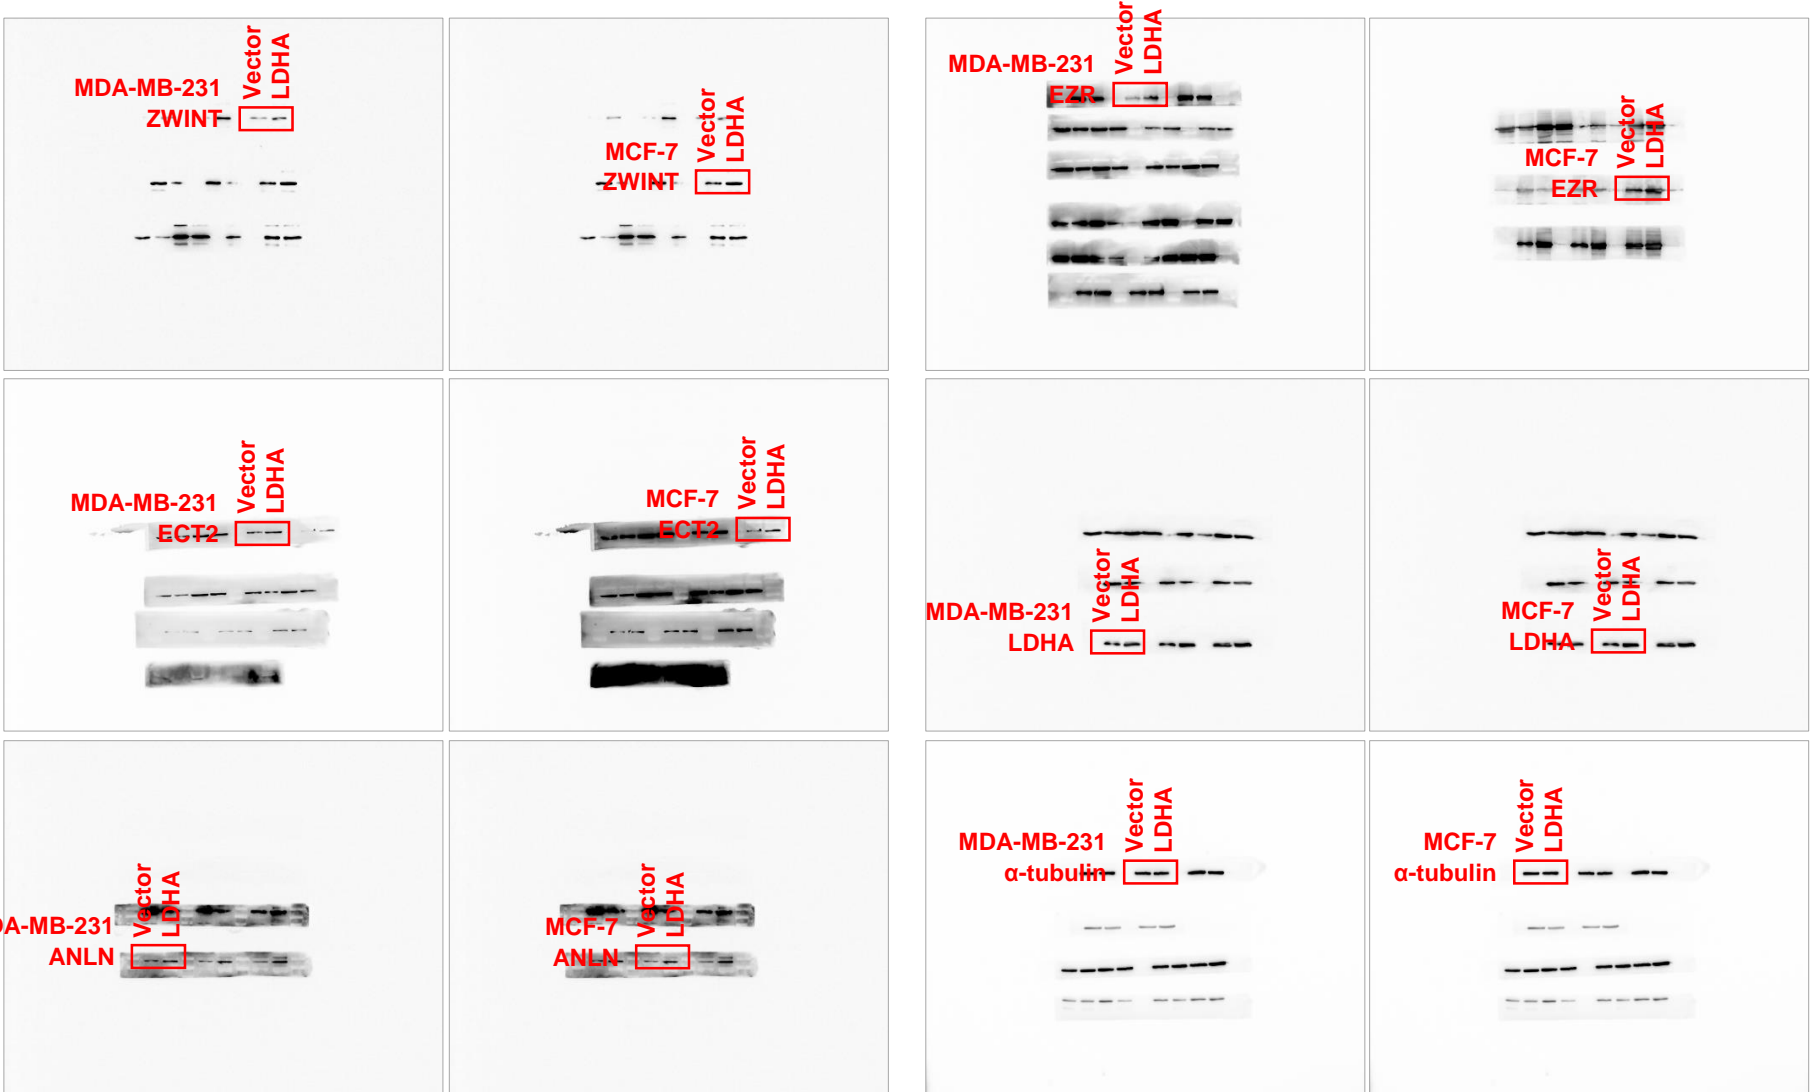



# Supplementary Fig. S10e repeat 2

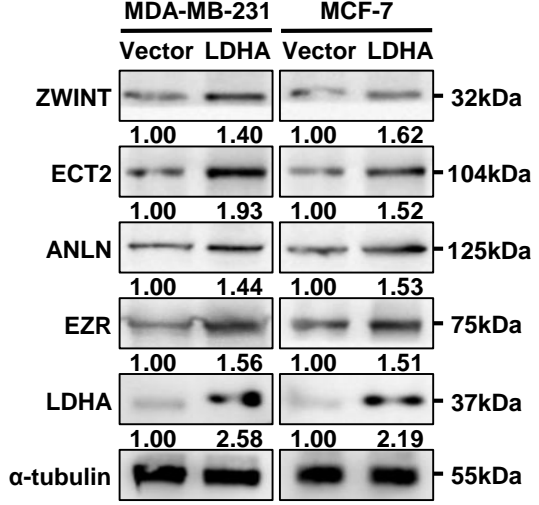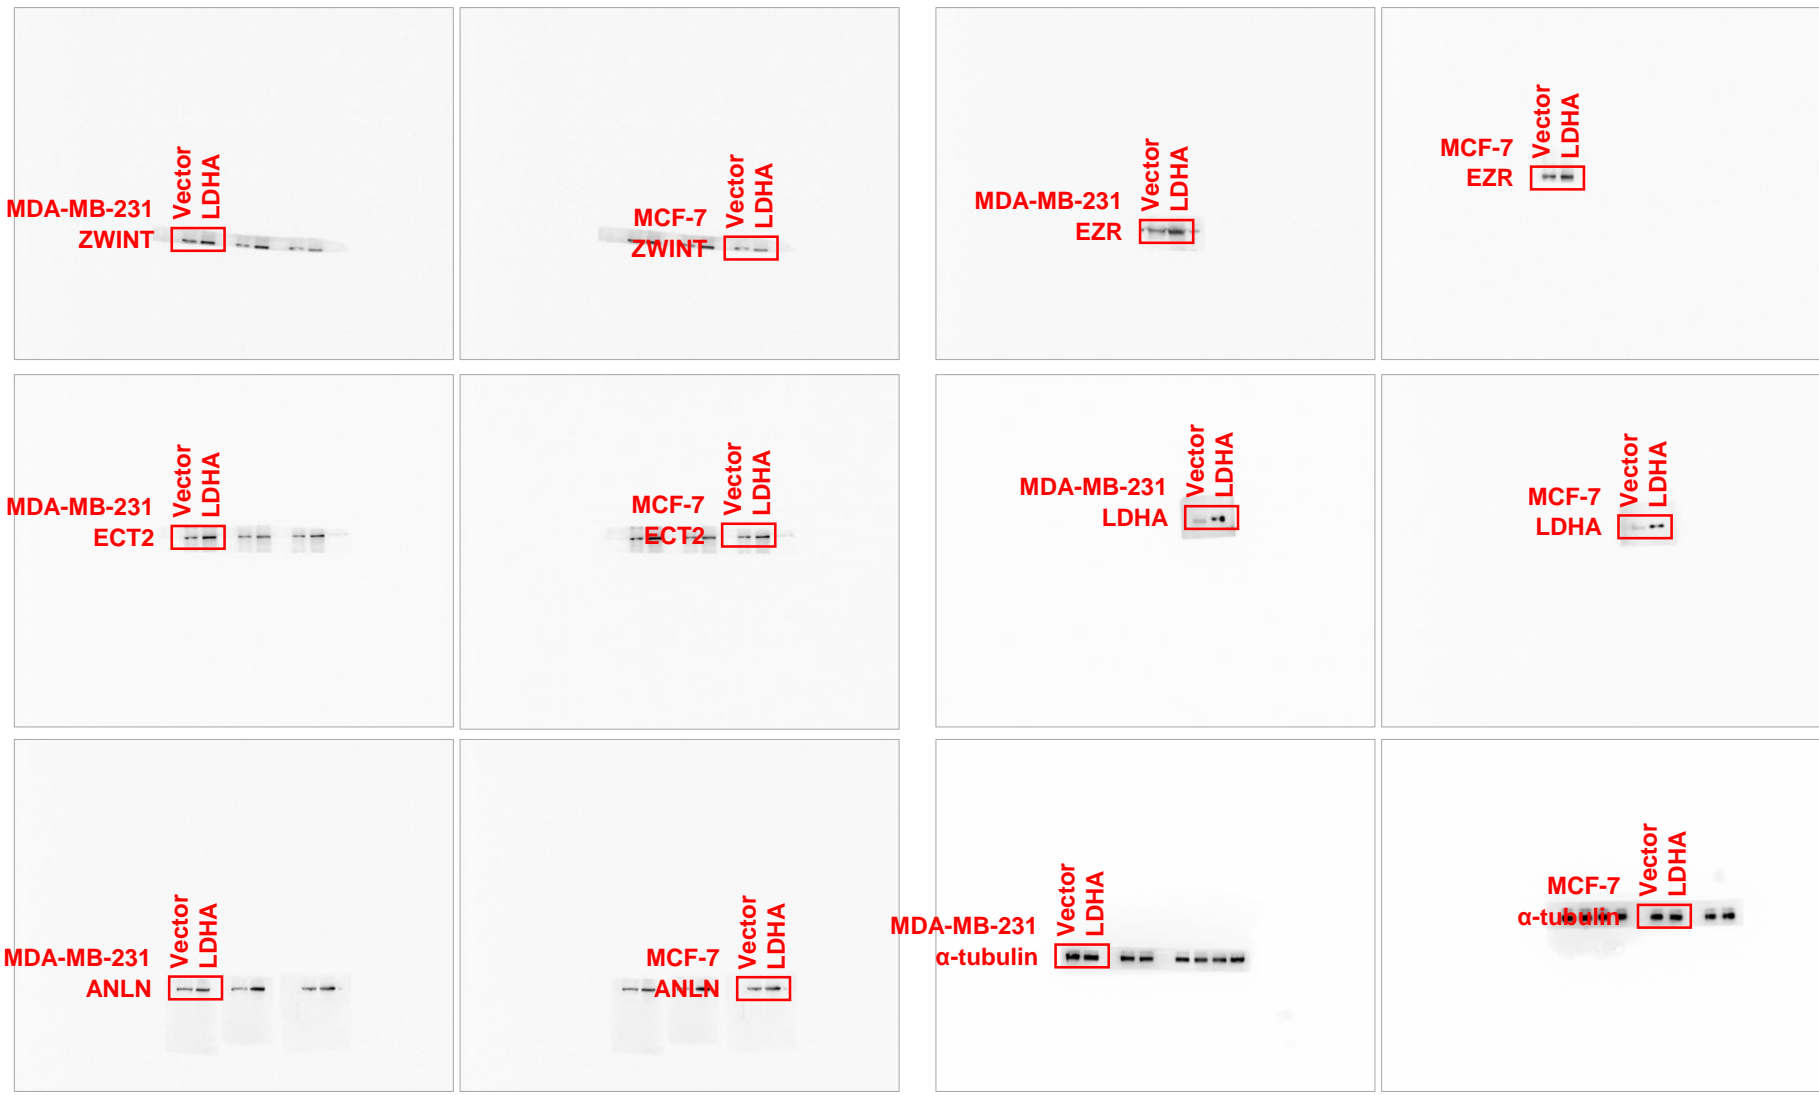

# Supplementary Fig. S10e repeat 3

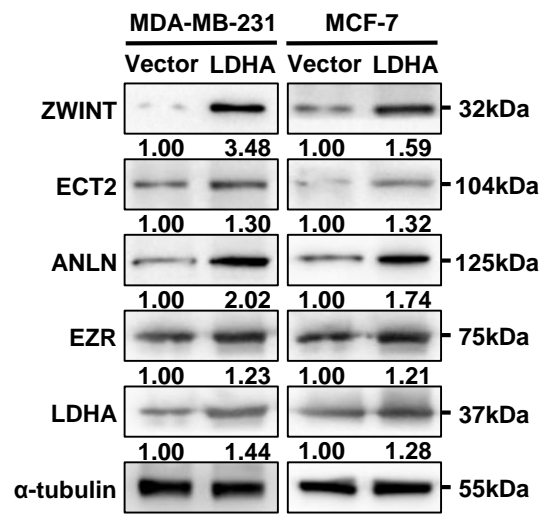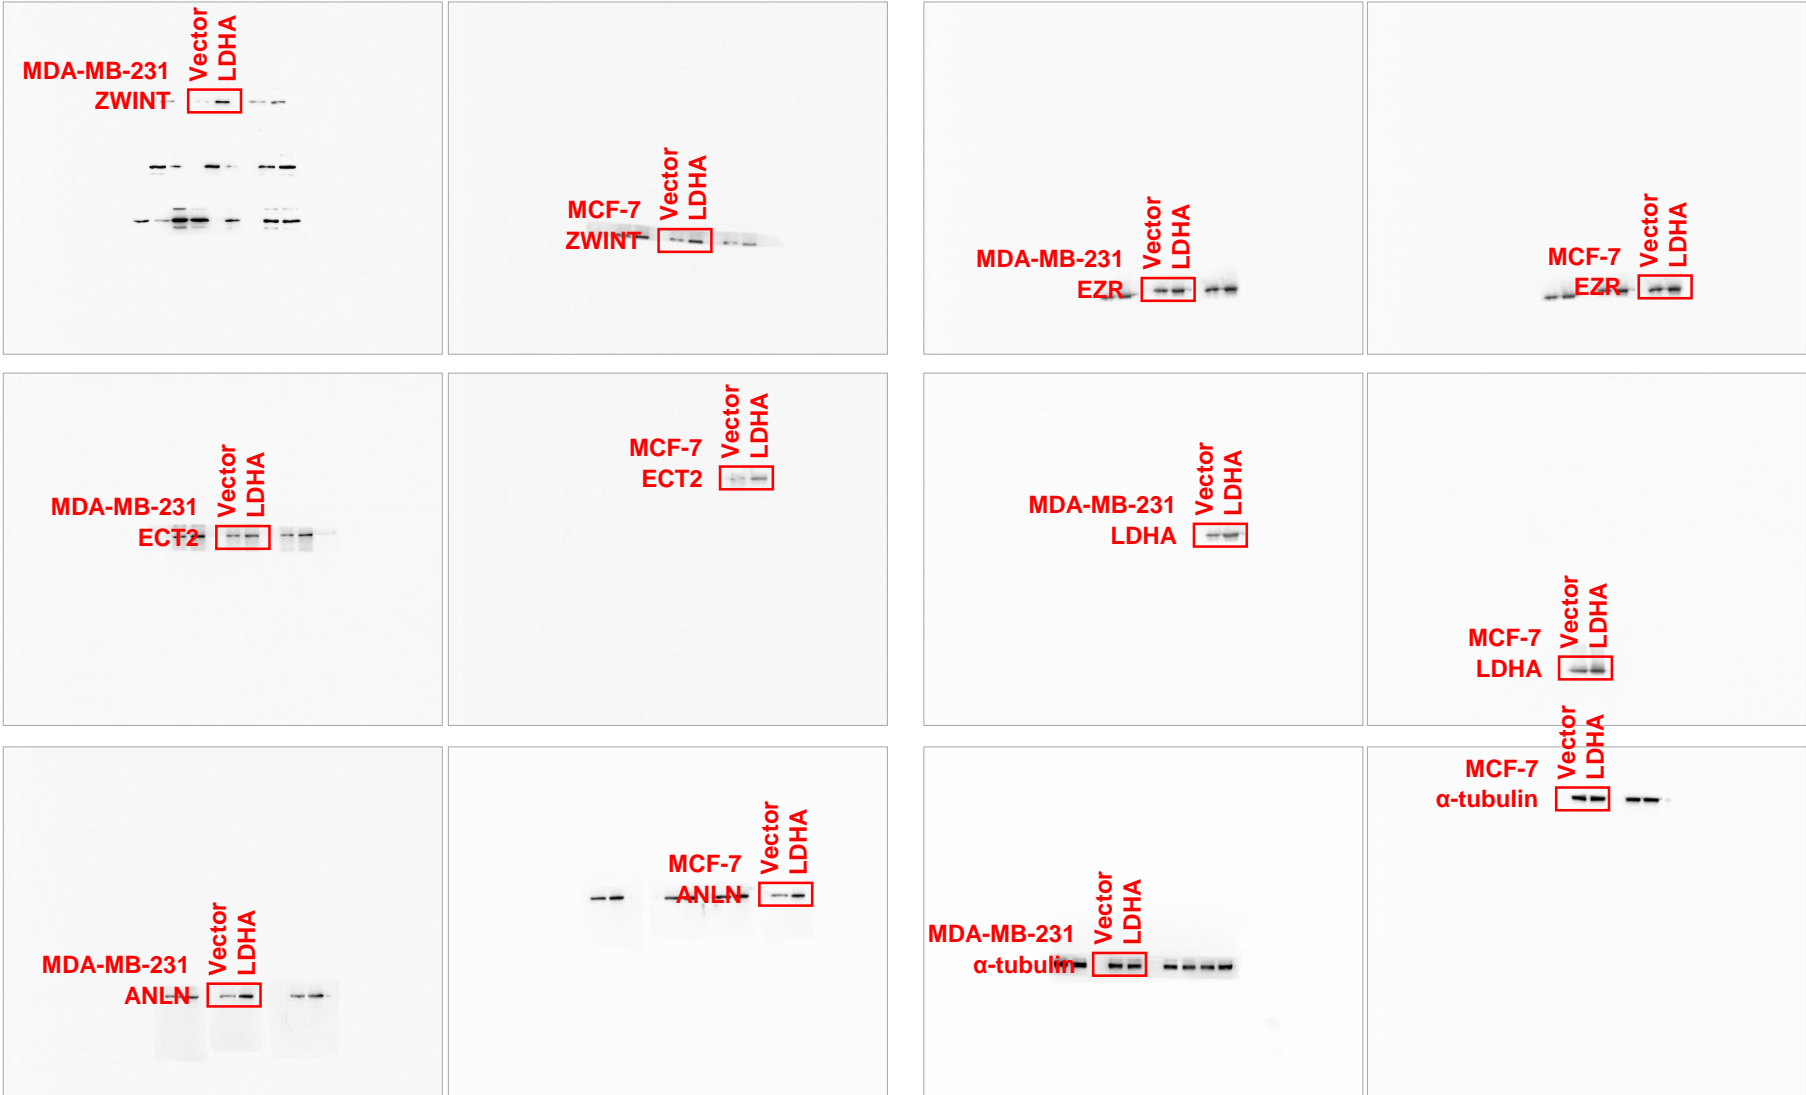

Supplement: pbio.3002666.s002.pdf [file pbio.3002666.s002.pdf]
